# Supplementary material
Source: PubMed Central journal article supplement (PMC7008213)
Supplement: mic-165-842-s001.pdf [file mic-165-842-s001.pdf]

## Supplementary material

Fig. S1 Cell size of NC-7 in different osmolality media. The area of cells was measured in Image J, and histograms of measured areas are shown. Cell sizes are similar in MLB from 340-0 mM NaCl. In LB 170 mM NaCl cell size is somewhat larger, and at 68 and 34 mM NaCl they show a spread to much larger size.

Fig S2 Growth of L forms in each medium assayed by Coomassie dye, as detailed in Methods. (a) NC-7 cells growing in the indicated media. Cells in each medium were diluted 100 or 50-fold in the same medium. The 100-fold dilutions were for cells cultured in MLB (340 mM NaCl), MLB (136 mM NaCl), LB (170 mM NaCl) and LB (68 mM NaCl). The 50-fold dilutions were for cells cultured in MLB (0 mM NaCl) and LB (34 mM NaCl). (b) *B. subtilis* LR-2L. 100-fold dilutions were for cells cultured in 2xPAB+SMM (0.5 M sucrose) and 2xPAB+SMM (0.2 M sucrose). 50-fold dilutions were for cells cultured in 2xPAB+SMM (0 M sucrose) and LB (170 mM NaCl) + 10mM MgCl<sub>2</sub>. The vertical axis is the amount of Coomassie dye that bound to cells and was resolubilized by destainer.

Fig. S3 The change of the ratio of long/short axis length after treatment by Chir-090 and EDTA. Because NC-7 has amorphous shapes, we defined the short axis to be the diameter of the largest circle that could be inscribed inside the cell, and the long axis to be a diameter of the smallest circle that could circumscribe the cell. The ratio of the long/short axis is 1 for a spherical shape and increases for elongated shapes. (a) Distribution of the ratio for NC-7 in MLB (340 mM NaCl). (b) This NC-7 was treated with Chir-090 as shown in Fig. 2d. (c) NC-7 was treated with 10 mM EDTA as shown in Fig. 3a.

Fig. S4 Localization of fully functional FtsZ-YFP expressed in NC-7. (a) shows the YFP signal and (b) the corresponding DIC image. Asterisks shows potential Z rings rarely formed at constriction sites. Bar is 10  $\mu$ m.

Fig. S5 Localization of FtsZ-YFP-mts expressed in NC-7. FtsZ rings and spirals were seen in some cells. Bar is 10  $\mu$ m.

Fig. S6 Diameter of LR-2L in different osmolality media. About 100 LR-2L cells were measured in each indicated medium. The box includes the 25-75%, the whiskers minimum-maximum and the dots show the few outlier cells.

Table S1 Genotypes and sources of bacterial strains or genomic sequences.

Table S2 Genomic sequencing results for NC-7. The reference sequence is W3110 genome (NC\_007779.1). Blue color shows the different mutations compared to NC-7/34

Table S3 Genomic sequencing results for NC-7/34. The reference sequence is W3110 genome (NC\_007779.1). Red color shows the different mutations compared to NC-7.

Movie S1 and S2. NC-7 in low osmolality (34 mM NaCl) LB medium lysed and divided following removal of divalent cations by EDTA. In Movie S2 membrane tubule (outer membrane) release was also observed. The rate of these movies is 12 s/s.

Movie S3. Division of NC-7 in osmoprotective medium, MLB. The rate of the movie is 120 s/s.

Movie S4. Division of NC-7 by budding in MLB. The rate of the movie is 120 s/s.

Movie S5. NC-7 was cultured in MLB and 10 mM EDTA was added to remove divalent cations. The division shown in this movie occurred ~5 min after addition of EDTA. The rate of movie is 12 s/s.

Movie S6. NC-7 in EDTA extruding a membrane tubule in low osmolality (51 mM NaCl) LB medium. The tubule extrudes from a protrusion, which relaxes to spherical as the extrusion grows. The rate of movie is 12 s/s.

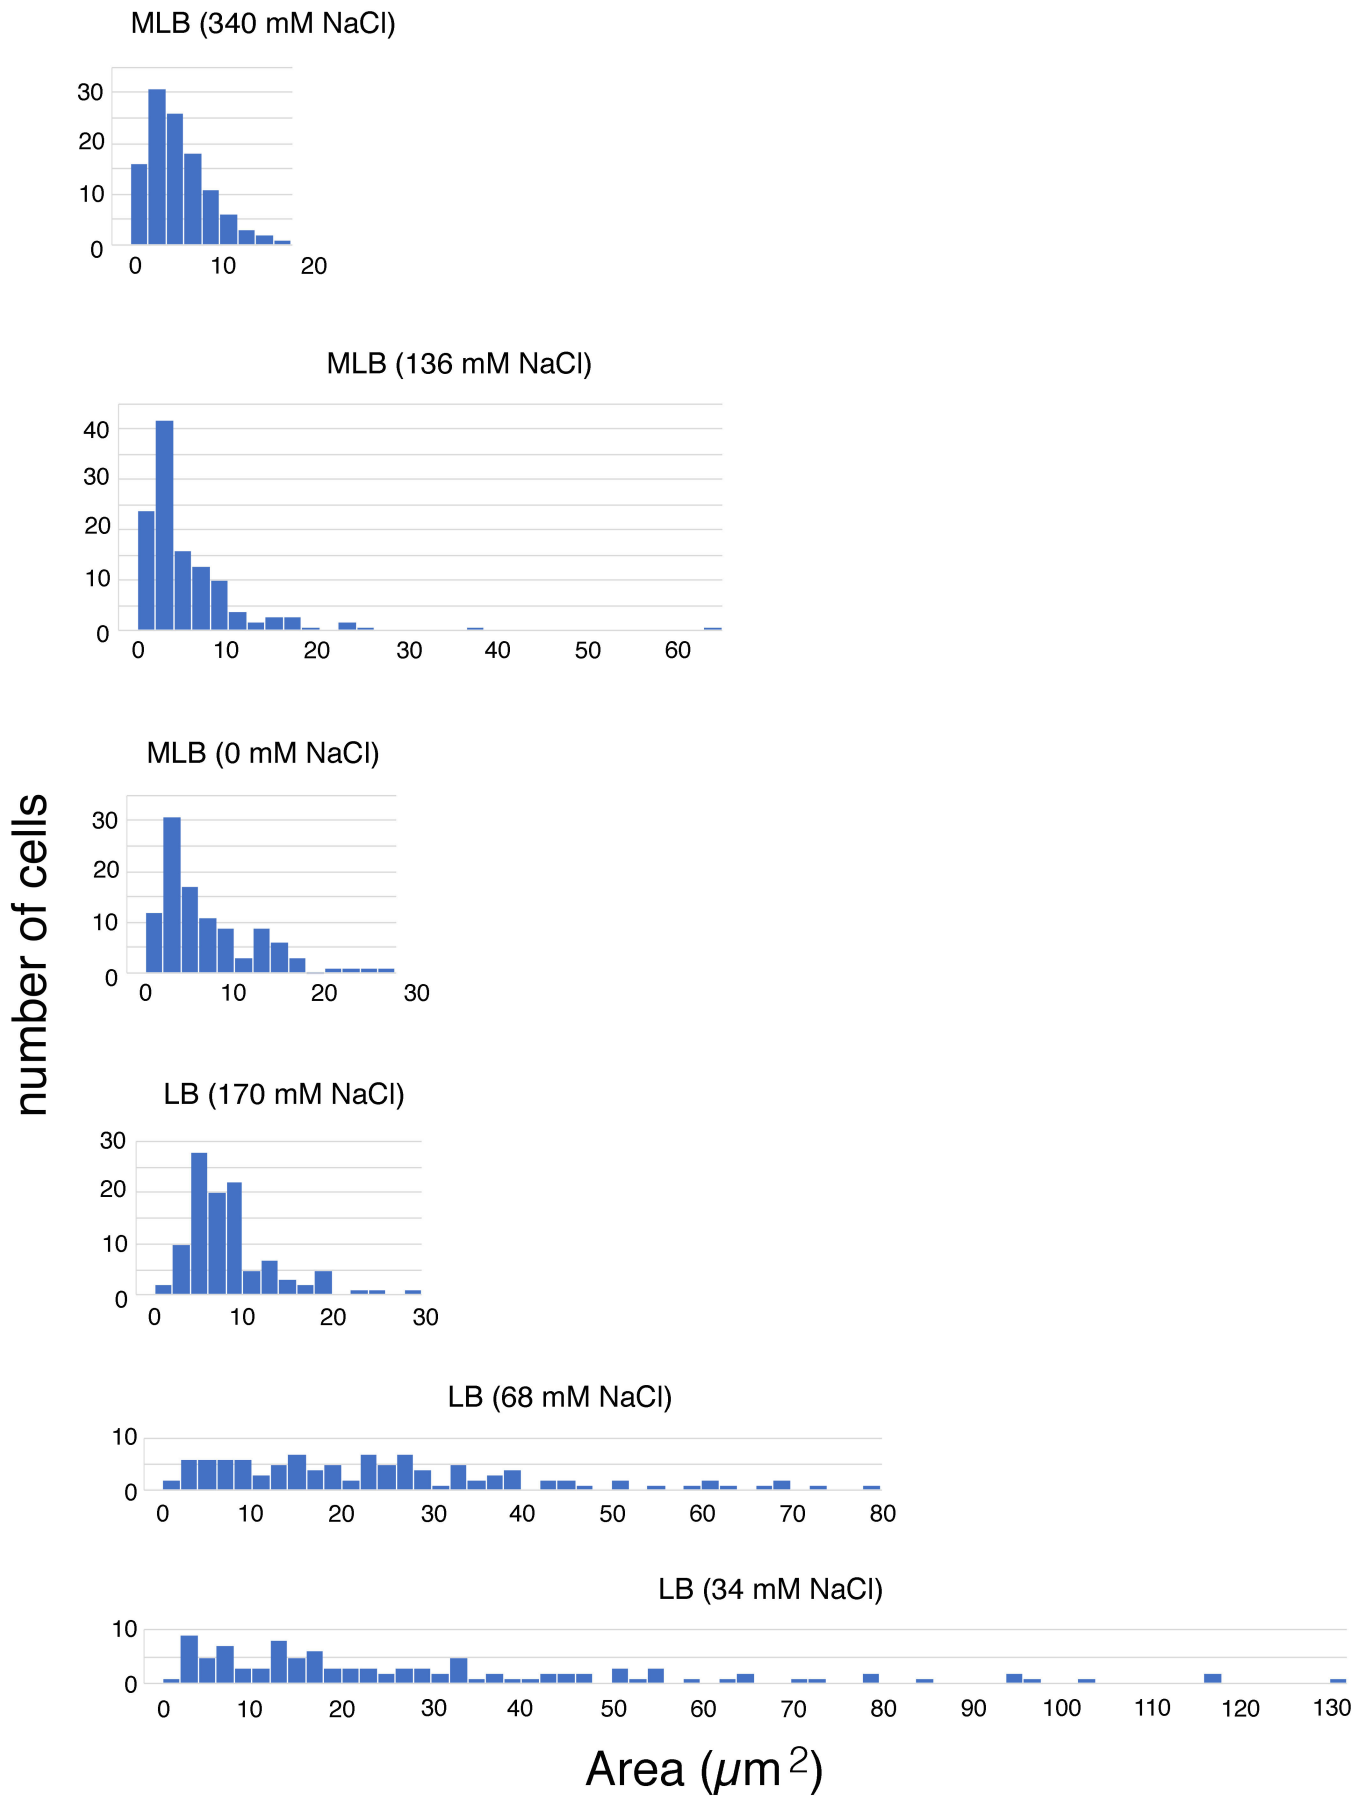

Fig. S1

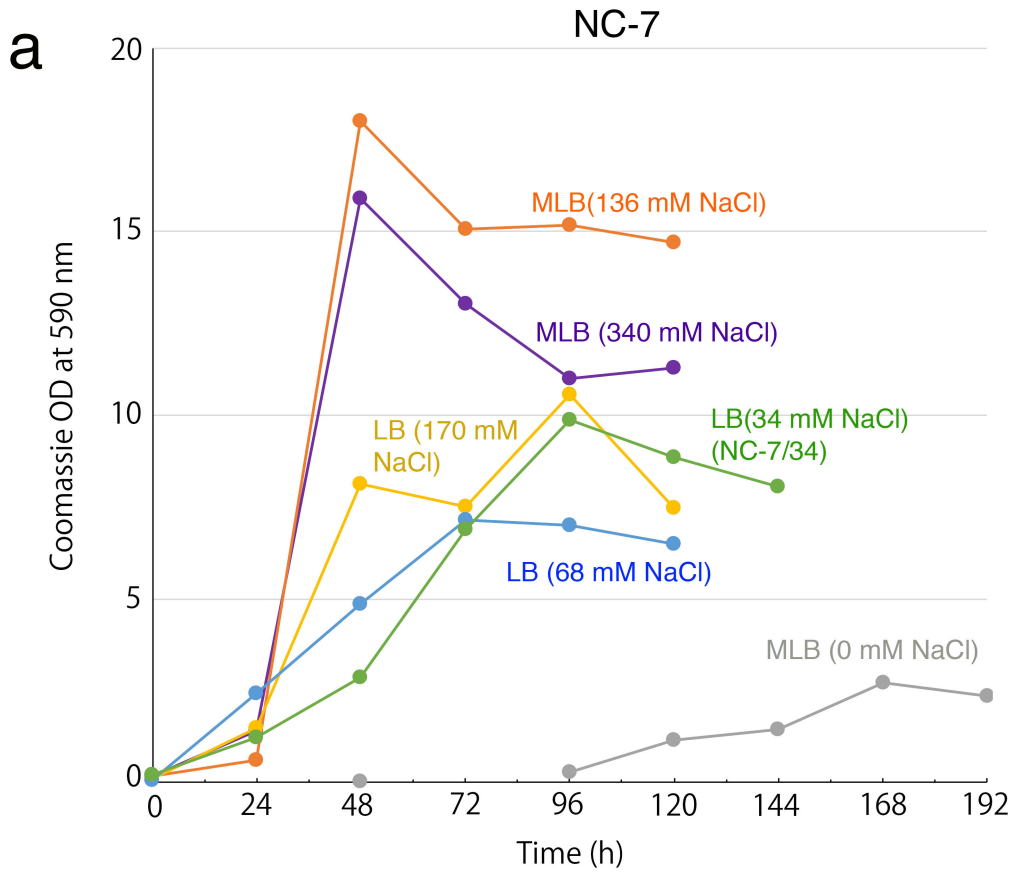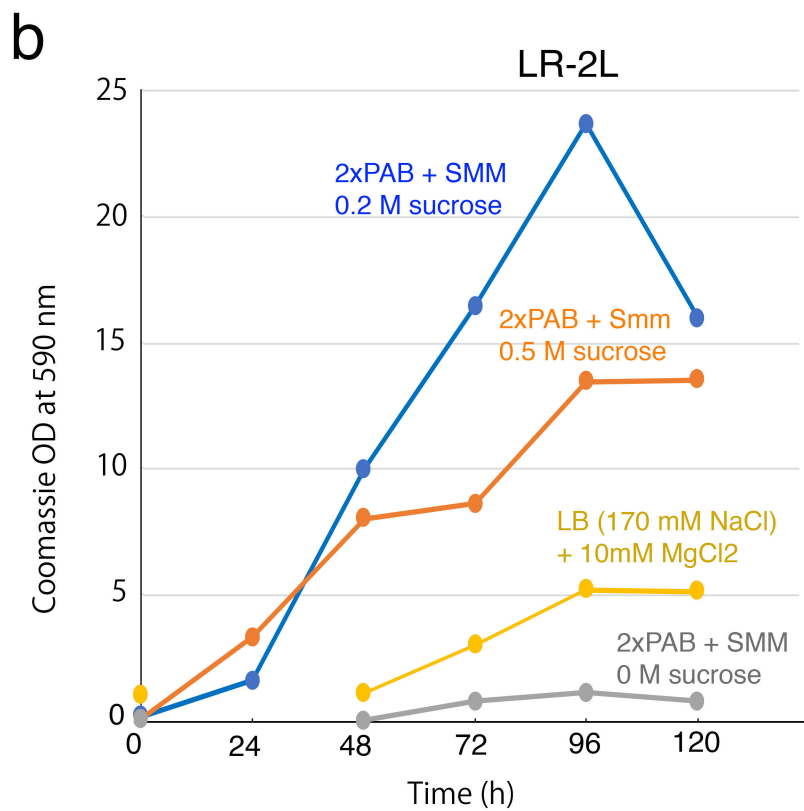

Fig. S2

Ratio of long/short axis of cells

**a** MLB (340 mM NaCl)

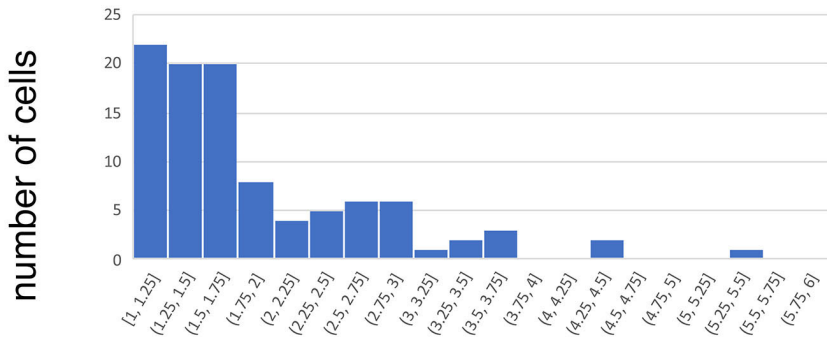

**b** LB (34 mM NaCl)

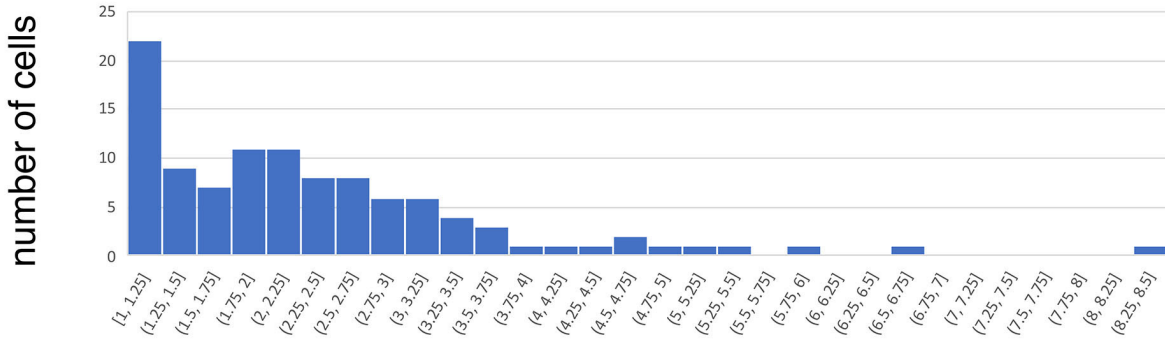

**c** + CHIR-090

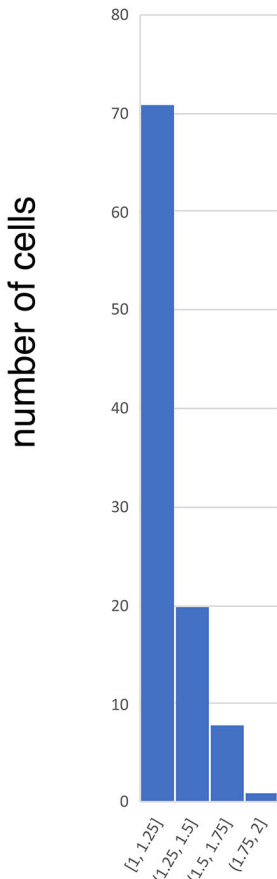

**d** + 10 mM EDTA

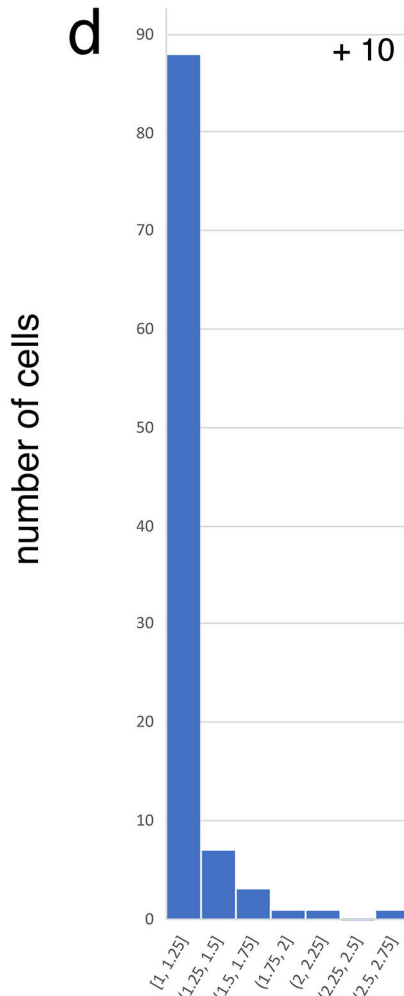

Fig. S3

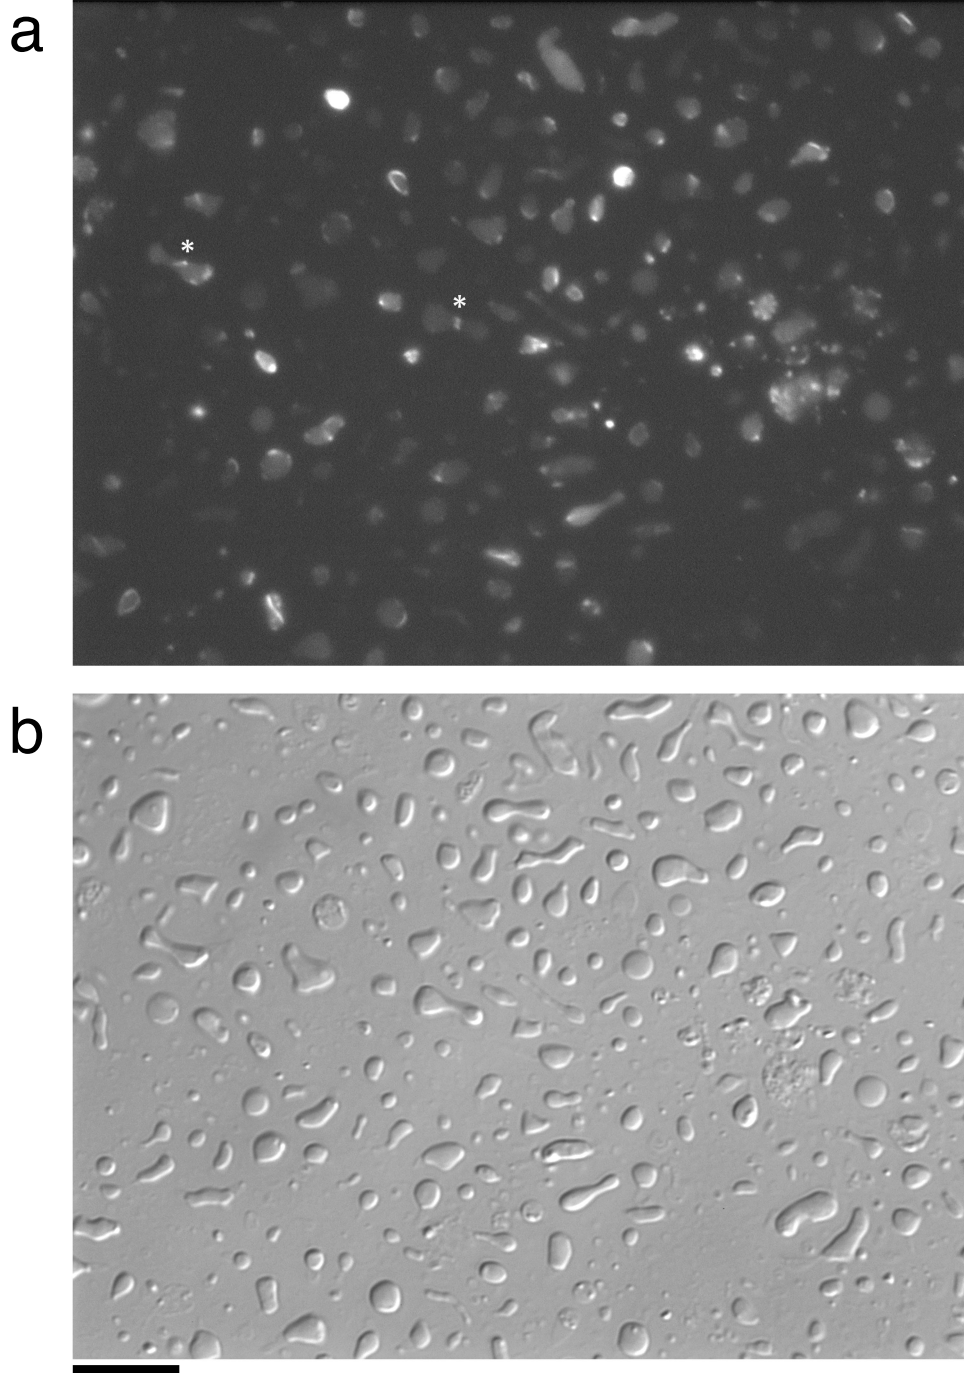

Fig. S4

a

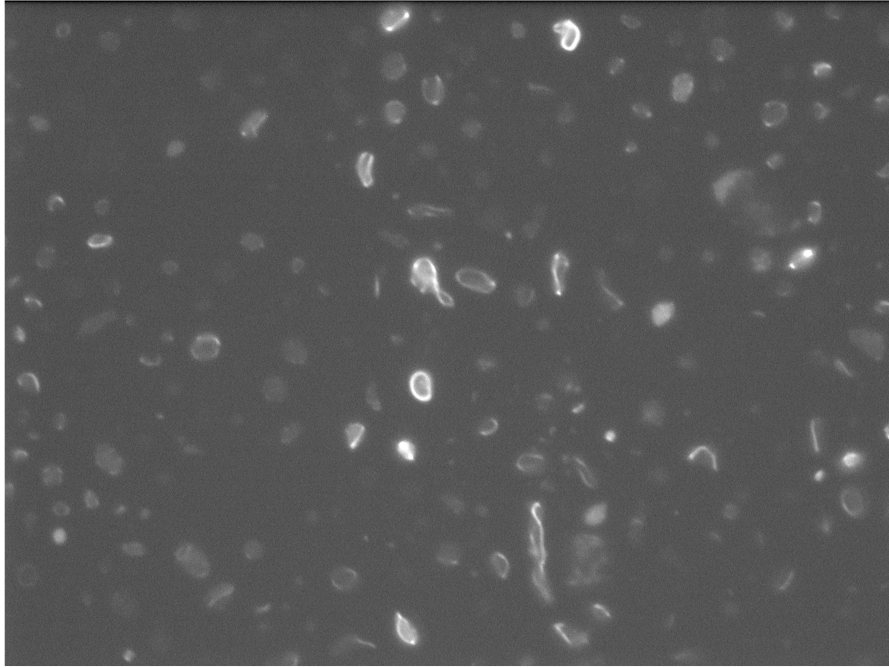

b

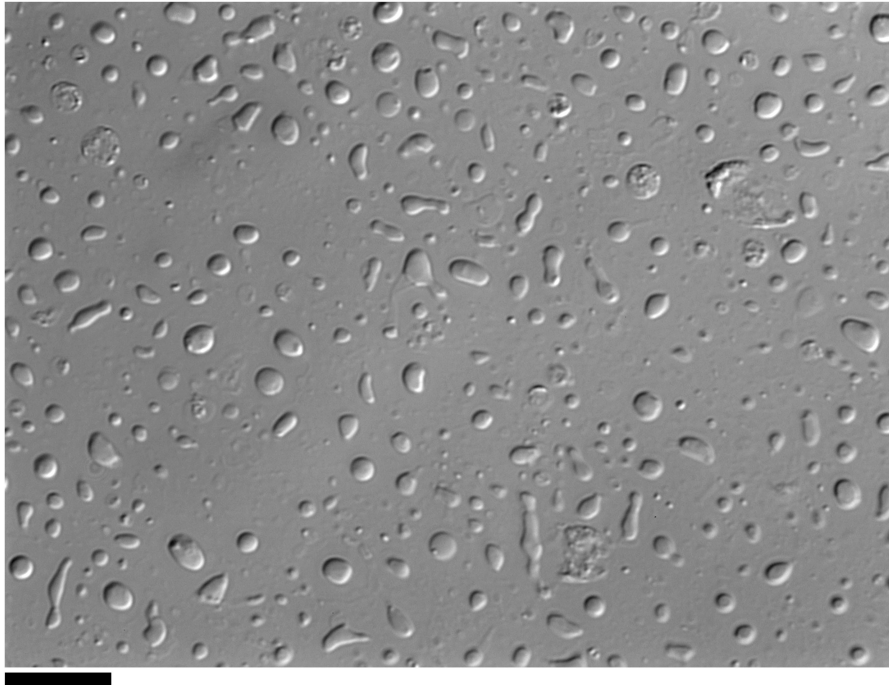

Fig.S5

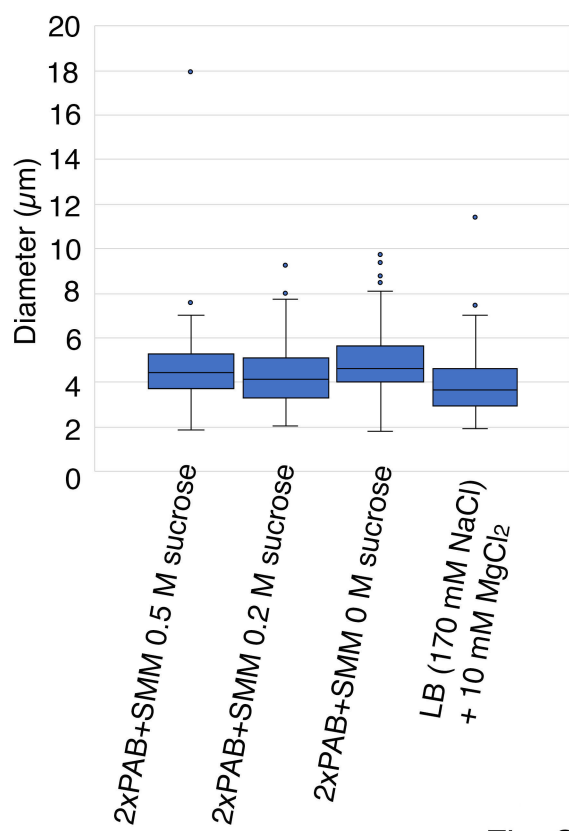

Fig. S6



| Strains | Genotype                                                                                                                                                                                | Source                       |
|---------|-----------------------------------------------------------------------------------------------------------------------------------------------------------------------------------------|------------------------------|
| 3301    | K-12 wild type                                                                                                                                                                          | (1)                          |
|         | <a href="http://www.nbrc.nite.go.jp/NBRC2/NBRCCatalogueDetailServlet?ID=NBRC&amp;CAT=00003301">http://www.nbrc.nite.go.jp/NBRC2/NBRCCatalogueDetailServlet?ID=NBRC&amp;CAT=00003301</a> |                              |
| W3110   | (derivative from K-12) F <sup>-</sup> lambda <sup>-</sup> IN(rrnD-rrnE)1 rph-1                                                                                                          | NCBI Ref Seq:<br>NC_007779.1 |
| JM109   | (derivative from K-12) F' <i>traD36 proA<sup>+</sup>B<sup>+</sup> lacI<sup>q</sup> Δ(lacZ)M15/ Δ(lac-proAB) glnV44 e14<sup>-</sup>gyrA96 recA1 relA1 endA1 thi hsdR17</i>               | (2)                          |
| NC-7    | Stable L form derived from 3301 mutated with a mutagen MNG                                                                                                                              | (1)                          |
| NC-7/51 | NC-7 adapted to LB with 51 mM NaCl                                                                                                                                                      | this work                    |
| NC-7/34 | NC-7 adapted to LB with 34 mM NaCl                                                                                                                                                      | this work                    |
| LR-2    | Bs115 <i>xseB</i> * (Frameshift 22T>-)                                                                                                                                                  | (3)                          |

## References

1. Onoda T, Oshima A, Nakano S, Matsuno A. Morphology, growth and reversion in a stable L-form of *Escherichia coli*. JGenMicrobiol. 1987;133:527-34.
2. Yanisch-Perron C, Vieira J, Messing J. Improved M13 phage cloning vectors and host strains: nucleotide sequences of the M13mp18 and pUC19 vectors. Gene. 1985;33(1):103-19.
3. Mercier R, Kawai Y, Errington J. Excess membrane synthesis drives a primitive mode of cell proliferation. Cell. 2013;152(5):997-1007.

## SNPs in NC-7

Reference: W3110 genome (NC\_007779.1)

Blue color: mutations that NC-7/34 does not have

## Table S2

| reference position | ref_base<-> sample_base | gene direction | aa mutation | mutate_ type   | gene pos_start | gene pos_end | Total Depth | Mutation Depth | gene name                                                           |
|--------------------|-------------------------|----------------|-------------|----------------|----------------|--------------|-------------|----------------|---------------------------------------------------------------------|
| 15136              | C->T                    | +              | C->C        | Synonymous     | 14168          | 15298        | 200         | 200            | dnaJ - Chaperone protein DnaJ                                       |
| 31866              | G->A                    | +              | P->P        | Synonymous     | 30817          | 34038        | 249         | 249            | carbB - Carbamoyl-phosphate synthase large chain                    |
| 61618              | G->A                    | +              | W->*        | Premature_stop | 60358          | 63264        | 191         | 190            | rapA - RNA polymerase-associated protein RapA                       |
| 78795              | T->C                    | +              | V->A        | Nonsynonymous  | 77621          | 78799        | 206         | 206            | setA - Sugar efflux transporter A                                   |
| 97378              | C->T                    | +              | L->L        | Synonymous     | 97087          | 98403        | 183         | 183            | murD - UDP-N-acetylmuramoylalanine--D-glutamate ligase              |
| 105062             | C->T                    | +              | P->S        | Nonsynonymous  | 103982         | 105244       | 218         | 217            | ftsA - Cell division protein FtsA                                   |
| 111392             | C->T                    | +              | P->S        | Nonsynonymous  | 111044         | 111433       | 236         | 236            | mutT - 8-oxo-dGTP diphosphatase                                     |
| 132188             | C->T                    | +              | P->S        | Nonsynonymous  | 131615         | 134212       | 239         | 239            | acnB - Aconitate hydratase B                                        |
| 132526             | C->T                    | +              | G->G        | Synonymous     | 131615         | 134212       | 191         | 191            | acnB - Aconitate hydratase B                                        |
| 134941             | T->C                    | +              | H->H        | Synonymous     | 134788         | 135582       | 200         | 200            | speD - S-adenosylmethionine decarboxylase proenzyme                 |
| 150554             | G->A                    | -              | V->I        | Nonsynonymous  | 149715         | 150953       | 211         | 211            | yadC - Putative fimbrial-like adhesin protein                       |
| 198729             | C->T                    | +              | L->F        | Nonsynonymous  | 197928         | 200360       | 230         | 230            | bamA - Outer membrane protein assembly factor BamA                  |
| 199515             | G->A                    | +              | G->S        | Nonsynonymous  | 197928         | 200360       | 188         | 187            | bamA - Outer membrane protein assembly factor BamA                  |
| 203991             | C->T                    | +              | T->M        | Nonsynonymous  | 203348         | 204496       | 210         | 210            | lpxB - Lipid-A-disaccharide synthase                                |
| 212759             | C->T                    | +              | V->V        | Synonymous     | 212331         | 213629       | 240         | 239            | tijS - tRNA(Ile)-lysidine synthase                                  |
| 234048             | G->A                    | -              | R->R        | Synonymous     | 234027         | 234782       | 187         | 187            | glbB - Hydroxyacylglutathione hydrolase GlbB                        |
| 235748             | G->A                    | -              | R->*        | Premature_stop | 235535         | 236002       | 205         | 205            | rnhA - Ribonuclease H                                               |
| 246249             | G->A                    | -              | G->E        | Nonsynonymous  | 246242         | 246502       | 182         | 182            | dinJ - Antitoxin DinJ                                               |
| 256834             | C->T                    | +              | T->I        | Nonsynonymous  | 256527         | 257771       | 195         | 195            | frsA - Esterase FrsA                                                |
| 258484             | C->T                    | -              | R->C        | Nonsynonymous  | 258269         | 259324       | 184         | 183            | phoE - Outer membrane pore protein E precursor                      |
| 271981             | G->A                    | -              | G->E        | Nonsynonymous  | 271692         | 272117       | 248         | 248            | hypothetical protein                                                |
| 273150             | C->T                    | +              | N->N        | Synonymous     | 272071         | 273216       | 136         | 136            | hypothetical protein                                                |
| 283759             | T->G                    | +              | A->A        | Synonymous     | 282425         | 284392       | 229         | 228            | yagF - D-xylonate dehydratase YagF                                  |
| 286919             | C->T                    | +              | P->S        | Nonsynonymous  | 286013         | 287623       | 230         | 228            | yagH - Putative beta-xylosidase                                     |
| 288812             | G->A                    | -              | A->T        | Nonsynonymous  | 288525         | 289529       | 184         | 183            | argF - Ornithine carbamoyltransferase subunit F                     |
| 306063             | G->A                    | -              | V->M        | Nonsynonymous  | 306031         | 308556       | 203         | 202            | ecpC - Probable outer membrane usher protein EcpC precursor         |
| 321132             | G->A                    | +              | A->T        | Nonsynonymous  | 320832         | 321551       | 221         | 221            | ykgE - Uncharacterized protein YkgE                                 |
| 337962             | G->A                    | +              | A->A        | Synonymous     | 337549         | 338967       | 203         | 203            | yahG - Uncharacterized protein YahG                                 |
| 340335             | C->T                    | +              | T->M        | Nonsynonymous  | 339389         | 340339       | 181         | 181            | yahl - Carbamate kinase-like protein Yahl                           |
| 346855             | G->A                    | -              | Q->Q        | Synonymous     | 346081         | 347667       | 204         | 203            | prpR - Propionate catabolism operon regulatory protein              |
| 364950             | G->A                    | -              | D->N        | Nonsynonymous  | 362455         | 365529       | 173         | 173            | lacZ - Beta-galactosidase                                           |
| 398307             | G->A                    | -              | G->D        | Nonsynonymous  | 398249         | 398557       | 204         | 203            | yaiY - Inner membrane protein YaiY                                  |
| 403872             | C->T                    | +              | L->L        | Synonymous     | 402927         | 404042       | 204         | 204            | dgcC - Probable diguanylate cyclase DgcC                            |
| 433738             | C->T                    | +              | R->C        | Nonsynonymous  | 432679         | 433782       | 218         | 217            | ribD - Riboflavin biosynthesis protein RibD                         |
| 449023             | C->T                    | -              | A->A        | Synonymous     | 447874         | 449865       | 199         | 199            | cyoB - Cytochrome o ubiquinol oxidase subunit I                     |
| 450121             | G->A                    | -              | A->A        | Synonymous     | 449887         | 450834       | 233         | 232            | HMPREF1608_04559 - Ubiquinol oxidase subunit 2                      |
| 454754             | C->T                    | +              | T->I        | Nonsynonymous  | 454357         | 455655       | 201         | 201            | tig - Trigger factor                                                |
| 460180             | C->T                    | +              | S->F        | Nonsynonymous  | 458112         | 460466       | 219         | 219            | lon - Lon protease                                                  |
| 524387             | C->T                    | +              | L->L        | Synonymous     | 522485         | 526765       | 205         | 201            | rhdS - Protein RhdS                                                 |
| 534446             | C->T                    | +              | P->L        | Nonsynonymous  | 533140         | 534921       | 221         | 221            | gcl - Glyoxylate carboligase                                        |
| 541956             | T->C                    | +              | V->A        | Nonsynonymous  | 541112         | 542257       | 237         | 234            | glxK - Glycerate 3-kinase                                           |
| 542970             | T->C                    | -              | F->L        | Nonsynonymous  | 542485         | 543270       | 183         | 183            | allE - (S)-ureidoglycine aminohydrolase                             |
| 547694             | A->G                    | +              | E->E        | Synonymous     | 547581         | 547841       | 246         | 245            | hypothetical protein                                                |
| 588685             | C->T                    | -              | A->V        | Nonsynonymous  | 587205         | 590177       | 235         | 234            | bacteriophage N4 adsorption protein A                               |
| 720326             | T->C                    | -              | V->A        | Nonsynonymous  | 718684         | 720882       | 202         | 199            | speF - Inducible ornithine decarboxylase                            |
| 845812             | G->A                    | -              | D->N        | Nonsynonymous  | 843677         | 845902       | 197         | 197            | MscS Mechanosensitive ion channel                                   |
| 861269             | G->A                    | -              | G->D        | Nonsynonymous  | 860596         | 863028       | 180         | 179            | ybiW - Putative formate acetyltransferase 3                         |
| 932433             | T->C                    | -              | S->P        | Nonsynonymous  | 931507         | 932472       | 188         | 188            | trxB - Thioredoxin reductase                                        |
| 963494             | A->C                    | +              | T->P        | Nonsynonymous  | 962417         | 964090       | 190         | 189            | rpsA - 30S ribosomal protein S1                                     |
| 973612             | C->A                    | -              | P->Q        | Nonsynonymous  | 973044         | 973823       | 205         | 205            | elyC - Envelope biogenesis factor ElyC                              |
| 996238             | C->T                    | -              | A->V        | Nonsynonymous  | 995265         | 996410       | 193         | 192            | ssuD - Alkanesulfonate monooxygenase                                |
| 1008500            | A->G                    | +              | I->V        | Nonsynonymous  | 1008266        | 1010374      | 169         | 169            | rmlL - Ribosomal RNA large subunit methyltransferase K/L            |
| 1093686            | T->C                    | +              | V->A        | Nonsynonymous  | 1093298        | 1094656      | 151         | 148            | GGDEF domain-containing protein                                     |
| 1109401            | G->A                    | -              | P->Q        | Nonsynonymous  | 1109361        | 1110518      | 197         | 197            | mdoC - Glucans biosynthesis protein C                               |
| 1153518            | G->A                    | +              | V->V        | Start_syn      | 1153516        | 1154757      | 158         | 158            | fabF - 3-oxoacyl-[acyl-carrier-protein] synthase 2                  |
| 1171413            | T->C                    | -              | L->P        | Nonsynonymous  | 1170989        | 1171951      | 166         | 165            | LysM peptidoglycan-binding domain-containing protein                |
| 1191557            | T->C                    | -              | T->T        | Synonymous     | 1191353        | 1192024      | 179         | 178            | phoP - Transcriptional regulatory protein PhoP                      |
| 1195272            | C->T                    | -              | Q->*        | Premature_stop | 1194244        | 1195350      | 185         | 185            | mnmA - tRNA-specific 2-thiouridylase MnmA                           |
| 1244877            | C->T                    | +              | P->S        | Nonsynonymous  | 1244757        | 1245368      | 156         | 156            | emtA - Endo-type membrane-bound lytic murein transglycosylase A     |
| 1283734            | A->G                    | +              | K->R        | Nonsynonymous  | 1281441        | 1285184      | 189         | 189            | narZ - Nitrate reductase, alpha subunit                             |
| 1303706            | A->T                    | +              | N->Y        | Nonsynonymous  | 1302896        | 1304527      | 173         | 173            | oppA - Oligopeptide ABC transporter substrate-binding protein       |
| 1308450            | T->G                    | +              | S->A        | Nonsynonymous  | 1307478        | 1308482      | 140         | 139            | oppF - Oligopeptide transport ATP-binding protein OppF              |
| 1342851            | G->A                    | +              | D->N        | Nonsynonymous  | 1342272        | 1343441      | 154         | 154            | yciM - Lipopolysaccharide assembly protein B                        |
| 1352278            | T->C                    | -              | M->T        | Nonsynonymous  | 1351965        | 1352753      | 206         | 204            | fabI - Enoyl-[acyl-carrier-protein] reductase [NADH] FabI           |
| 1360573            | A->G                    | -              | Y->C        | Nonsynonymous  | 1359516        | 1360901      | 190         | 190            | puuP - Putrescine importer PuuP                                     |
| 1395099            | C->T                    | +              | A->A        | Synonymous     | 1394941        | 1396554      | 180         | 179            | mppA - Periplasmic murein peptide-binding protein precursor         |
| 1401237            | A->C                    | -              | I->L        | Nonsynonymous  | 1400488        | 1401240      | 187         | 187            | fnr - Fumarate and nitrate reduction regulatory protein             |
| 1419558            | A->G                    | -              | E->E        | Synonymous     | 1419552        | 1419722      | 208         | 206            | ydaE - Uncharacterized protein YdaE                                 |
| 1460853            | A->G                    | +              | H->R        | Nonsynonymous  | 1460768        | 1462195      | 210         | 210            | paahH - 3-hydroxybutyryl-CoA dehydrogenase PaahH                    |
| 1727618            | A->G                    | -              | E->G        | Nonsynonymous  | 1727395        | 1727634      | 195         | 195            | ydhL - Uncharacterized protein YdhL                                 |
| 1842973            | G->A                    | -              | G->S        | Nonsynonymous  | 1842497        | 1843117      | 245         | 243            | ynjF - Predicted phosphatidyl transferase, inner membrane protein   |
| 1853155            | C->T                    | +              | P->P        | Synonymous     | 1852574        | 1853590      | 196         | 196            | ansA - Cytoplasmic asparaginase I                                   |
| 1862439            | T->C                    | -              | V->A        | Nonsynonymous  | 1861970        | 1863046      | 233         | 232            | ydjL - Uncharacterized zinc-type alcohol dehydrogenase-like protein |
| 1881449            | G->A                    | -              | G->R        | Nonsynonymous  | 1881303        | 1881662      | 212         | 211            | yeaR - Uncharacterized protein YeaR                                 |
| 1935684            | C->T                    | -              | A->V        | Nonsynonymous  | 1934507        | 1936318      | 205         | 205            | edd - Phosphogluconate dehydratase                                  |
| 2034560            | T->C                    | -              | V->V        | Synonymous     | 2034521        | 2035216      | 220         | 220            | yedJ - Uncharacterized protein YedJ                                 |
| 2042570            | C->A                    | +              | A->D        | Nonsynonymous  | 2041615        | 2042619      | 220         | 220            | mononuclear molybdenum enzyme YedY                                  |
| 2075625            | G->A                    | +              | S->S        | Synonymous     | 2073676        | 2076795      | 236         | 234            | antigen 43                                                          |
| 2079713            | C->T                    | +              | T->I        | Nonsynonymous  | 2079706        | 2080080      | 179         | 179            | G943_02322 - Toxin YeeV                                             |
| 2105304            | G->A                    | -              | E->K        | Nonsynonymous  | 2105077        | 2105526      | 188         | 188            | wbL-lipopolysaccharide biosynthesis protein /pseudo                 |
| 2117087            | T->C                    | -              | M->T        | Nonsynonymous  | 2116639        | 2118033      | 173         | 173            | wcaM - Colanic acid biosynthesis protein WcaM precursor             |
| 2143227            | C->T                    | +              | Q->*        | Premature_stop | 2141896        | 2143749      | 186         | 186            | gmd - GDP-mannose 4,6-dehydratase                                   |
| 2159947            | A->G                    | +              | T->A        | Nonsynonymous  | 2157400        | 2160522      | 191         | 189            | mdtB - Multidrug resistance protein MdtB                            |
| 2164514            | C->A                    | +              | P->Q        | Nonsynonymous  | 2163601        | 2165016      | 214         | 214            | mdtD - Putative multidrug resistance protein MdtD                   |
| 2204520            | T->C                    | +              | I->T        | Nonsynonymous  | 2203613        | 2207245      | 232         | 229            | yehI - Uncharacterized protein YehI                                 |
| 2204648            | G->A                    | +              | A->T        | Nonsynonymous  | 2203613        | 2207245      | 205         | 202            | yehI - Uncharacterized protein YehI                                 |
| 2224957            | A->G                    | -              | S->G        | Nonsynonymous  | 2223026        | 2225323      | 211         | 210            | bgIX - Beta-D-glucoside glucohydrolase, periplasmic                 |
| 2236680            | G->A                    | +              | A->T        | Nonsynonymous  | 2236212        | 2236931      | 205         | 205            | sanA - Uncharacterized protein                                      |
| 2251784            | G->A                    | -              | G->D        | Nonsynonymous  | 2250397        | 2251866      | 217         | 217            | lysP - Lysine-specific permease                                     |
| 2252272            | G->A                    | -              | A->A        | Synonymous     | 2252071        | 2252952      | 210         | 210            | Uncharacterized HTH-type transcriptional regulator YeeI             |
| 2312900            | C->T                    | -              | R->R        | Synonymous     | 2312675        | 2313739      | 237         | 237            | ada - 6-O-methylguanine DNA methyltransferase                       |
| 2386003            | G->C                    | -              | D->N        | Nonsynonymous  | 2385752        | 2386213      | 195         | 195            | elaA - Protein ElaA                                                 |
| 2400347            | C->T                    | -              | L->F        | Nonsynonymous  | 2400012        | 2400566      | 172         | 172            | nuoJ - NADH:ubiquinone oxidoreductase, membrane subunit J           |
| 2433637            | A->G                    | -              | M->V        | Nonsynonymous  | 2433503        | 2434072      | 200         | 200            | ubix - Flavin prenyltransferase Ubix                                |
| 2435840            | A->G                    | -              | T->A        | Nonsynonymous  | 2435721        | 2436209      | 196         | 194            | cvpA - Colicin V production protein                                 |

|         |       |   |       |                |         |         |     |     |                                                                      |
|---------|-------|---|-------|----------------|---------|---------|-----|-----|----------------------------------------------------------------------|
| 2445091 | G<->A | - | G<->D | Nonsynonymous  | 2444388 | 2445566 | 179 | 179 | yfcJ - Uncharacterized MFS-type transporter YfcJ                     |
| 2509335 | C<->T | - | R<->R | Synonymous     | 2507436 | 2509931 | 205 | 204 | fryA - Multiphosphoryl transfer protein 1                            |
| 2513255 | C<->T | - | T<->I | Nonsynonymous  | 2512093 | 2513340 | 207 | 207 | yfcJ - Uncharacterized MFS-type transporter YfcJ                     |
| 2513309 | T<->C | - | V<->A | Nonsynonymous  | 2512093 | 2513340 | 200 | 200 | yfcJ - Uncharacterized MFS-type transporter YfcJ                     |
| 2573345 | G<->A | - | E<->E | Synonymous     | 2572958 | 2573659 | 196 | 196 | eutQ - Ethanolamine utilization protein EutQ                         |
| 2607052 | G<->A | + | V<->I | Nonsynonymous  | 2605573 | 2607153 | 174 | 173 | hyfF - Hydrogenase-4 component F                                     |
| 2630956 | G<->A | - | G<->D | Nonsynonymous  | 2629614 | 2631191 | 214 | 214 | guaA - GMP synthase [glutamine-hydrolyzing]                          |
| 2645124 | A<->G | - | E<->E | Synonymous     | 2643669 | 2645981 | 193 | 193 | pbpC - Penicillin-binding protein 1C                                 |
| 2677153 | G<->A | - | V<->I | Nonsynonymous  | 2677040 | 2678023 | 199 | 199 | yphF - ABC transporter periplasmic-binding protein yphF              |
| 2686208 | G<->A | - | A<->T | Nonsynonymous  | 2686125 | 2687459 | 205 | 205 | glrR - Transcriptional regulatory protein GlrR                       |
| 2712527 | C<->T | + | P<->S | Nonsynonymous  | 2711552 | 2712886 | 201 | 201 | srmB - ATP-dependent RNA helicase SrmB                               |
| 2720188 | C<->T | + | P<->L | Nonsynonymous  | 2718609 | 2721269 | 208 | 207 | pka - Protein lysine acetyltransferase Pka                           |
| 2734071 | G<->A | - | M<->I | Nonsynonymous  | 2733687 | 2734667 | 177 | 177 | riuD - Ribosomal large subunit pseudouridine synthase D              |
| 2749579 | C<->T | + | C<->C | Synonymous     | 2749487 | 2750365 | 201 | 201 | yjyB - NAD kinase                                                    |
| 2777205 | G<->A | - | G<->D | Nonsynonymous  | 2776802 | 2781382 | 201 | 201 | ypjA - Uncharacterized outer membrane protein YpjA precursor         |
| 2820080 | C<->G | - | G<->G | Synonymous     | 2818037 | 2820667 | 170 | 170 | alaS - Alanine--tRNA ligase                                          |
| 2825442 | G<->A | + | R<->H | Nonsynonymous  | 2825048 | 2826007 | 206 | 205 | srfE - PTS system glucitol/sorbitol-specific EIIB component          |
| 2830412 | G<->A | - | P<->P | Synonymous     | 2829431 | 2830945 | 198 | 198 | Anaerobic nitric oxide reductase transcription regulator NorR        |
| 2852385 | G<->A | + | W<->* | Premature_stop | 2851910 | 2852920 | 203 | 203 | hypE - Carbamoyl dehydratase HypE                                    |
| 2860426 | C<->T | + | A<->V | Nonsynonymous  | 2860086 | 2860994 | 221 | 221 | ltnD - L-threonate dehydrogenase                                     |
| 2866111 | T<->C | - | *<->Q | Nonsynonymous  | 2865215 | 2866207 | 272 | 272 | RNA polymerase sigma factor RpoS Qualifiers:Pseudo                   |
| 2878492 | G<->A | - | S<->G | Synonymous     | 2878444 | 2879043 | 236 | 236 | casE - CRISPR system Cascade subunit CasE                            |
| 2885753 | G<->A | - | W<->* | Premature_stop | 2883209 | 2885875 | 226 | 226 | vgcB - CRISPR-associated endonuclease/helicase Cas3                  |
| 2894674 | G<->A | - | V<->M | Nonsynonymous  | 2894432 | 2895211 | 263 | 263 | ycgR - Putative electron transfer flavoprotein subunit YcgR          |
| 2952371 | G<->A | - | S<->Q | Synonymous     | 2951117 | 2954659 | 219 | 219 | recB - RecBCD enzyme subunit RecB                                    |
| 2955708 | G<->A | - | Q<->Q | Synonymous     | 2954652 | 2957540 | 243 | 243 | ptrA - Protease 3 precursor                                          |
| 2960104 | C<->T | - | V<->V | Synonymous     | 2957716 | 2961084 | 234 | 234 | recC - RecBCD enzyme subunit RecC                                    |
| 2964118 | G<->A | - | V<->V | Synonymous     | 2963818 | 2964693 | 201 | 201 | lgt - Prolipoprotein diacylglyceryl transferase                      |
| 2969176 | C<->T | + | S<->F | Nonsynonymous  | 2969076 | 2969789 | 238 | 238 | vgdQ - UPF0053 inner membrane protein VgdQ                           |
| 2972309 | G<->A | - | G<->G | Synonymous     | 2971325 | 2972518 | 231 | 231 | lplT - Lysophospholipid transporter LplT                             |
| 3005140 | C<->T | + | R<->C | Nonsynonymous  | 3004918 | 3006108 | 237 | 237 | ygeW - Putative carbamoyltransferase YgeW                            |
| 3007720 | A<->G | + | M<->V | Nonsynonymous  | 3007420 | 3008631 | 215 | 215 | ygeY - Uncharacterized protein YgeY                                  |
| 3013111 | C<->T | - | N<->N | Synonymous     | 3012943 | 3013713 | 220 | 220 | yqcC - Uncharacterized protein YqcC                                  |
| 3021172 | C<->T | + | R<->C | Nonsynonymous  | 3019972 | 3022842 | 214 | 212 | A1W5_03602 - Selenate reductase subunit YgfN                         |
| 3034334 | G<->A | - | V<->M | Nonsynonymous  | 3033840 | 3034838 | 250 | 250 | peptide chain release factor 2                                       |
| 3055384 | T<->C | + | V<->A | Nonsynonymous  | 3054843 | 3055445 | 188 | 187 | J_5-formyltetrahydrofolate cyclo-ligase                              |
| 3056063 | A<->G | - | H<->R | Nonsynonymous  | 3055834 | 3057066 | 226 | 226 | serA - Phosphoglycerate dehydrogenase                                |
| 3056725 | G<->A | - | E<->E | Synonymous     | 3055834 | 3057066 | 225 | 225 | serA - Phosphoglycerate dehydrogenase                                |
| 3065829 | A<->G | - | M<->V | Start_nonsyn   | 3064933 | 3065829 | 197 | 196 | ygfI - Uncharacterized HTH-type transcriptional regulator YgfI       |
| 3075082 | G<->A | - | G<->D | Nonsynonymous  | 3074835 | 3076112 | 239 | 239 | yggP - Uncharacterized protein YggP                                  |
| 3083267 | G<->A | - | G<->D | Nonsynonymous  | 3082591 | 3084567 | 224 | 223 | speA - Biosynthetic arginine decarboxylase                           |
| 3095359 | C<->T | + | T<->I | Nonsynonymous  | 3095337 | 3095930 | 210 | 209 | rdgB - dTTP/XTP pyrophosphatase                                      |
| 3116444 | G<->A | - | T<->T | Synonymous     | 3113206 | 3117768 | 198 | 197 | yghJ - Putative lipoprotein AcfD homolog precursor                   |
| 3123063 | T<->C | - | H<->H | Synonymous     | 3122892 | 3124115 | 231 | 231 | glcF - Glycolate oxidase iron-sulfur subunit                         |
| 3124976 | G<->A | - | G<->E | Nonsynonymous  | 3124126 | 3125178 | 244 | 244 | glcE - Glycolate oxidase subunit GlcE                                |
| 3133071 | G<->A | + | L<->L | Synonymous     | 3132787 | 3133479 | 200 | 200 | yghT - Uncharacterized ATP-binding protein YghT                      |
| 3146218 | G<->A | - | V<->I | Nonsynonymous  | 3145512 | 3146275 | 198 | 198 | dienelactone hydrolase Qualifiers: Pseudo                            |
| 3155719 | C<->T | + | R<->R | Synonymous     | 3155279 | 3156106 | 255 | 255 | dkgA - 2,5-diketo-D-gluconic acid reductase A                        |
| 3180093 | C<->T | + | H<->H | Synonymous     | 3179077 | 3180237 | 230 | 230 | ygiC - Putative acid-amine ligase YgiC                               |
| 3182749 | G<->A | - | G<->D | Nonsynonymous  | 3182469 | 3183122 | 236 | 234 | ribB - 3,4-dihydroxy-2-butanone 4-phosphate synthase                 |
| 3202707 | C<->A | - | S<->R | Nonsynonymous  | 3201966 | 3202787 | 211 | 210 | uppP - Undecaprenyl-diphosphatase                                    |
| 3213880 | G<->A | - | E<->K | Nonsynonymous  | 3213623 | 3214129 | 243 | 243 | mug - G/U mismatch-specific DNA glycosylase                          |
| 3214544 | G<->A | - | A<->T | Nonsynonymous  | 3214383 | 3215147 | 206 | 204 | yqhJ - NADPH-dependent ferric-chelate reductase                      |
| 3223777 | C<->T | + | A<->V | Nonsynonymous  | 3221289 | 3224381 | 208 | 208 | ebgA - Evolved beta-galactosidase subunit alpha                      |
| 3297658 | G<->A | - | T<->T | Synonymous     | 3296953 | 3297993 | 183 | 183 | yraQ - UPF0718 protein YraQ                                          |
| 3300142 | G<->A | - | V<->I | Nonsynonymous  | 3300110 | 3300613 | 218 | 218 | Uncharacterized N-acetyltransferase YhbS                             |
| 3301440 | C<->T | + | A<->V | Nonsynonymous  | 3301340 | 3302335 | 211 | 211 | yhbU - Uncharacterized protease YhbU precursor                       |
| 3308518 | G<->A | - | A<->T | Nonsynonymous  | 3307895 | 3308779 | 186 | 186 | nlpI - Lipoprotein NlpI precursor                                    |
| 3327081 | G<->A | - | A<->T | Nonsynonymous  | 3326890 | 3327519 | 194 | 193 | rImE - Ribosomal RNA large subunit methyltransferase E               |
| 3327329 | G<->A | - | G<->D | Nonsynonymous  | 3326890 | 3327519 | 277 | 275 | rImE - Ribosomal RNA large subunit methyltransferase E               |
| 3331262 | G<->A | - | L<->L | Synonymous     | 3330437 | 3331609 | 195 | 195 | obg - GTPase Obg                                                     |
| 3339263 | G<->A | - | D<->N | Nonsynonymous  | 3339111 | 3339920 | 201 | 200 | Intermembrane phospholipid transport system ATP-binding protein MlaF |
| 3340526 | C<->T | + | L<->F | Nonsynonymous  | 3340130 | 3341107 | 261 | 261 | yrbG - Inner membrane protein YrbG                                   |
| 3369470 | G<->A | - | A<->T | Nonsynonymous  | 3369330 | 3370205 | 201 | 201 | nanK - N-acetylmannosamine kinase                                    |
| 3387896 | A<->C | - | T<->P | Nonsynonymous  | 3386076 | 3388043 | 216 | 215 | p-hydroxybenzoic acid efflux pump subunit AaeB                       |
| 3408433 | C<->T | + | F<->F | Synonymous     | 3407462 | 3408913 | 189 | 189 | panF - Sodium/pantothenate symporter                                 |
| 3411949 | C<->T | + | L<->L | Synonymous     | 3411508 | 3412392 | 196 | 196 | yhdJ - DNA adenine methyltransferase YhdJ                            |
| 3435534 | C<->T | - | S<->S | Synonymous     | 3435420 | 3436115 | 232 | 232 | yjaH - Uncharacterized protein YjaH                                  |
| 3545428 | G<->A | + | E<->K | Nonsynonymous  | 3544315 | 3545766 | 226 | 225 | frvB - Fructose-like PTS system EIIBC component                      |
| 3549903 | C<->T | - | L<->L | Synonymous     | 3549832 | 3550665 | 223 | 223 | fdhD - Sulfur carrier protein FdhD                                   |
| 3556206 | G<->A | + | A<->T | Nonsynonymous  | 3555453 | 3556382 | 207 | 206 | fdhE - Protein FdhE                                                  |
| 3563967 | C<->T | + | V<->V | Synonymous     | 3563110 | 3564006 | 230 | 228 | yihU - 3-sulfolactaldehyde reductase                                 |
| 3638274 | C<->T | - | A<->V | Nonsynonymous  | 3636536 | 3638698 | 512 | 511 | uvrD - DNA helicase                                                  |
| 3665074 | C<->T | - | I<->I | Synonymous     | 3664159 | 3665421 | 525 | 524 | wecC - UDP-N-acetyl-D-mannosamine dehydrogenase                      |
| 3665373 | C<->T | - | P<->S | Nonsynonymous  | 3664159 | 3665421 | 593 | 592 | wecC - UDP-N-acetyl-D-mannosamine dehydrogenase                      |
| 3669068 | C<->T | - | L<->L | Synonymous     | 3669005 | 3670264 | 488 | 488 | rho - Transcription termination factor Rho                           |
| 3677879 | C<->T | - | S<->F | Nonsynonymous  | 3677236 | 3678711 | 548 | 548 | ilvC - Ketol-acid reductoisomerase (NADP(+))                         |
| 3697901 | G<->T | - | G<->V | Nonsynonymous  | 3697462 | 3698454 | 212 | 212 | rbsR - Ribose operon repressor                                       |
| 3708128 | G<->A | + | A<->T | Nonsynonymous  | 3707078 | 3708529 | 209 | 209 | viaA - Protein ViaA                                                  |
| 3708738 | T<->C | - | H<->H | Synonymous     | 3708534 | 3709526 | 233 | 233 | asnA - Aspartate--ammonia ligase                                     |
| 3709275 | C<->T | - | H<->H | Synonymous     | 3708534 | 3709526 | 208 | 208 | asnA - Aspartate--ammonia ligase                                     |
| 3737455 | G<->A | + | W<->* | Premature_stop | 3737288 | 3738010 | 263 | 263 | Uncharacterized protein YieK                                         |
| 3739732 | C<->T | - | S<->F | Nonsynonymous  | 3739242 | 3739907 | 210 | 210 | yieH - 6-phosphogluconate phosphatase                                |
| 3765362 | G<->A | + | E<->E | Synonymous     | 3765255 | 3765944 | 240 | 239 | dgoR - Galactonate operon transcriptional repressor                  |
| 3768002 | C<->T | + | L<->L | Synonymous     | 3767417 | 3768565 | 218 | 218 | dgoD - D-galactonate dehydratase                                     |
| 3769336 | G<->A | + | D<->N | Nonsynonymous  | 3768685 | 3769977 | 234 | 233 | dgoT - D-galactonate transporter                                     |
| 3810387 | C<->T | - | L<->L | Synonymous     | 3810079 | 3811470 | 223 | 223 | xanP - Xanthine permease XanP                                        |
| 3819632 | G<->A | + | V<->I | Nonsynonymous  | 3819245 | 3820927 | 254 | 254 | ligB - DNA ligase B                                                  |
| 3846193 | C<->T | - | S<->P | Nonsynonymous  | 3845496 | 3846428 | 222 | 221 | hldD - ADP-L-glycero-D-manno-heptose-6-epimerase                     |
| 3857348 | G<->A | + | A<->T | Nonsynonymous  | 3856754 | 3857773 | 260 | 260 | gpsA - Glycerol-3-phosphate dehydrogenase [NAD(P)+]                  |
| 3863639 | C<->T | - | L<->L | Synonymous     | 3863388 | 3863750 | 255 | 253 | yibL - Uncharacterized protein YibL                                  |
| 3879961 | G<->A | + | D<->N | Nonsynonymous  | 3879166 | 3880557 | 234 | 234 | selA - L-seryl-tRNA(Sec) selenium transferase                        |
| 3911121 | G<->A | + | A<->A | Synonymous     | 3911044 | 3912498 | 254 | 253 | lyx - L-xylose/3-keto-L-gulonate kinase                              |
| 3921623 | G<->A | + | D<->N | Nonsynonymous  | 3921371 | 3922081 | 292 | 292 | viaF - Uncharacterized protein ViaF                                  |
| 3944732 | G<->A | + | R<->R | Synonymous     | 3944466 | 3945182 | 245 | 245 | cellulose biosynthesis protein BcsQ                                  |
| 3946134 | T<->C | + | F<->S | Nonsynonymous  | 3945179 | 3947797 | 257 | 256 | Cellulose synthase catalytic subunit [UDP-forming] bcsA              |
| 3947486 | G<->A | + | V<->I | Nonsynonymous  | 3945179 | 3947797 | 215 | 214 | Cellulose synthase catalytic subunit [UDP-forming] bcsA              |
| 3956311 | G<->A | + | A<->A | Synonymous     | 3954797 | 3956785 | 246 | 245 | yhkK - Cyclic-di-GMP phosphodiesterase                               |
| 3980100 | C<->T | - | R<->C | Nonsynonymous  | 3980026 | 3981183 | 224 | 224 | mdtE - Multidrug resistance protein mdtE                             |

|         |       |   |       |                |         |         |     |     |                                                                                |
|---------|-------|---|-------|----------------|---------|---------|-----|-----|--------------------------------------------------------------------------------|
| 4044826 | C<->T | + | S<->F | Nonsynonymous  | 4044012 | 4044938 | 212 | 212 | High-affinity branched-chain amino acid transport system permease protein LivH |
| 4096319 | G<->A | + | V<->M | Nonsynonymous  | 4095572 | 4096342 | 248 | 248 | bioH - Pimeloyl-[acyl-carrier protein] methyl ester esterase                   |
| 4106900 | C<->A | - | C<->* | Premature_stop | 4105976 | 4107598 | 228 | 228 | pckA - Phosphoenolpyruvate carboxykinase (ATP)                                 |
| 4127720 | G<->A | + | A<->T | Nonsynonymous  | 4126778 | 4127782 | 237 | 237 | trp5 - Tryptophan--tRNA ligase                                                 |
| 4134023 | A<->C | + | D<->A | Nonsynonymous  | 4133080 | 4134384 | 232 | 232 | yhfT - Uncharacterized protein YhfT                                            |
| 4153852 | C<->T | - | L<->L | Synonymous     | 4153664 | 4154296 | 221 | 221 | cAMP-activated global transcriptional regulator CRP                            |
| 4154211 | A<->C | - | K<->T | Nonsynonymous  | 4153664 | 4154296 | 217 | 217 | cAMP-activated global transcriptional regulator CRP                            |
| 4174425 | A<->G | - | H<->R | Nonsynonymous  | 4174196 | 4174873 | 182 | 182 | Type 4 prepilin-like proteins leader peptide-processing enzyme gspO            |
| 4175229 | C<->T | - | P<->S | Nonsynonymous  | 4174873 | 4175334 | 186 | 185 | gspM - Putative type II secretion system protein M                             |
| 4185186 | C<->T | + | Q<->* | Premature_stop | 4185018 | 4186487 | 186 | 186 | gspA - Export protein A for general secretion pathway                          |
| 4187209 | A<->G | + | T<->A | Nonsynonymous  | 4187146 | 4187457 | 227 | 226 | rpsJ - 30S ribosomal protein S10                                               |
| 4218060 | A<->T | + | Q<->L | Nonsynonymous  | 4217870 | 4218799 | 219 | 219 | metAS - Homoserine O-succinyltransferase                                       |
| 4220395 | G<->A | + | G<->D | Nonsynonymous  | 4219068 | 4220669 | 188 | 186 | aceB - Malate synthase                                                         |
| 4228142 | C<->T | + | T<->I | Nonsynonymous  | 4227418 | 4231101 | 221 | 220 | metH - Methionine synthase                                                     |
| 4253829 | C<->T | + | A<->V | Nonsynonymous  | 4253144 | 4254064 | 215 | 215 | malM - Maltose operon periplasmic protein precursor                            |
| 4323774 | T<->C | - | Y<->H | Nonsynonymous  | 4323439 | 4324284 | 227 | 227 | Alpha-D-ribose 1-methylphosphonate 5-phosphate C-P lyase phnJ                  |
| 4328795 | G<->A | - | G<->E | Nonsynonymous  | 4328014 | 4329300 | 258 | 257 | phnD - Phosphonates-binding periplasmic protein precursor                      |
| 4330404 | T<->C | - | Y<->H | Nonsynonymous  | 4329976 | 4330419 | 246 | 246 | crfC - Clamp-binding protein CrfC                                              |
| 4393271 | G<->A | - | A<->A | Synonymous     | 4390727 | 4394050 | 222 | 222 | Miniconductance mechanosensitive channel MscM                                  |
| 4411451 | C<->T | + | L<->L | Synonymous     | 4411334 | 4413775 | 256 | 254 | rnr - Ribonuclease R                                                           |
| 4412798 | C<->T | + | P<->S | Nonsynonymous  | 4411334 | 4413775 | 205 | 204 | rnr - Ribonuclease R                                                           |
| 4415449 | C<->T | + | L<->L | Synonymous     | 4415233 | 4415931 | 224 | 222 | yjfi - Uncharacterized protein Yjfi precursor                                  |
| 4426690 | C<->T | + | I<->I | Synonymous     | 4426388 | 4426852 | 215 | 213 | btxA - Ascorbate-specific PTS system, EIIA component                           |
| 4431520 | G<->A | - | A<->T | Nonsynonymous  | 4431308 | 4432102 | 194 | 193 | yjfZ - Uncharacterized protein YjfZ                                            |
| 4431658 | G<->A | - | G<->S | Nonsynonymous  | 4431308 | 4432102 | 187 | 185 | yjfZ - Uncharacterized protein YjfZ                                            |
| 4505698 | C<->A | - | V<->M | Start_nonsyn   | 4505468 | 4505698 | 222 | 221 | Lipopolysaccharide export system permease protein LptF                         |
| 4510917 | T<->T | + | F<->F | Synonymous     | 4509967 | 4511085 | 232 | 232 | yjhc - 1,5-anhydro-D-fructose reductase                                        |
| 4558942 | C<->T | + | A<->A | Synonymous     | 4557581 | 4559041 | 281 | 280 | uxuB - D-mannonate oxidoreductase                                              |
| 4583277 | G<->A | - | P<->P | Synonymous     | 4582638 | 4584017 | 224 | 224 | 5-methylcytosine-specific restriction enzyme McrBC, subunit McrB               |
| 4622443 | C<->T | + | D<->D | Synonymous     | 4622003 | 4622782 | 230 | 230 | deoC - Deoxyribose-phosphate aldolase                                          |
| 4624423 | T<->C | + | R<->R | Synonymous     | 4624283 | 4625506 | 204 | 204 | deoB - Phosphopentomutase                                                      |
| 4627768 | C<->T | + | R<->R | Synonymous     | 4626449 | 4627780 | 250 | 249 | yjji - Toxin Yjji                                                              |
| 4632715 | T<->C | + | S<->P | Nonsynonymous  | 4631995 | 4633227 | 215 | 212 | nadR - Trifunctional NAD biosynthesis/regulator protein NadR                   |

## SNPs (intergenic)

| reference position | ref_base<-> sample_base | mutate_ type | Total Depth | Mutation Depth |
|--------------------|-------------------------|--------------|-------------|----------------|
| 197926             | C<->T                   | intergenic   | 203         | 203            |
| 296550             | C<->T                   | intergenic   | 237         | 237            |
| 582068             | C<->T                   | intergenic   | 223         | 223            |
| 880916             | C<->T                   | intergenic   | 196         | 196            |
| 1006361            | A<->G                   | intergenic   | 183         | 181            |
| 1092779            | T<->C                   | intergenic   | 171         | 171            |
| 1401247            | G<->A                   | intergenic   | 176         | 173            |
| 2092069            | T<->C                   | intergenic   | 156         | 156            |
| 2141860            | G<->A                   | intergenic   | 216         | 215            |
| 2708958            | C<->T                   | intergenic   | 195         | 195            |
| 2816944            | C<->T                   | intergenic   | 118         | 118            |
| 2816953            | A<->T                   | intergenic   | 135         | 134            |
| 2816959            | T<->A                   | intergenic   | 144         | 142            |
| 2816980            | G<->A                   | intergenic   | 184         | 184            |
| 2855617            | C<->T                   | intergenic   | 194         | 194            |
| 2941871            | C<->T                   | intergenic   | 210         | 210            |
| 2943644            | A<->G                   | intergenic   | 200         | 200            |
| 2985962            | C<->T                   | intergenic   | 189         | 189            |
| 3006110            | C<->T                   | intergenic   | 223         | 223            |
| 3275045            | C<->T                   | intergenic   | 217         | 217            |
| 3464900            | T<->C                   | intergenic   | 285         | 284            |
| 3566228            | G<->A                   | intergenic   | 199         | 199            |
| 3689634            | G<->A                   | intergenic   | 497         | 495            |
| 3929803            | A<->G                   | intergenic   | 203         | 202            |
| 3932435            | C<->T                   | intergenic   | 258         | 258            |
| 3932468            | C<->T                   | intergenic   | 262         | 262            |
| 3975735            | G<->A                   | intergenic   | 229         | 229            |
| 4161616            | G<->A                   | intergenic   | 206         | 206            |
| 4189879            | G<->A                   | intergenic   | 201         | 200            |
| 4227228            | T<->C                   | intergenic   | 228         | 228            |
| 4297744            | A<->G                   | intergenic   | 214         | 213            |
| 4342921            | C<->T                   | intergenic   | 241         | 239            |
| 4514918            | T<->C                   | intergenic   | 204         | 204            |

## insertion/deletion mutations

| reference position start | reference position end | mutation | mutate_ type | Depth | gene name                                            |
|--------------------------|------------------------|----------|--------------|-------|------------------------------------------------------|
| 4399749                  | 4399750                | G        | Deletion     | 188   | nnrE - Bifunctional NAD(P)H-hydrate repair enzyme    |
| 4428525                  | 4428526                | C        | Deletion     | 200   | ulaF - L-ribulose-5-phosphate 4-epimerase UlaF       |
| 2175523                  | 2175523                | CGGAT    | Insertion    | 155   | gatC - PTS system galactitol-specific EIIC component |
| 723943                   | 723944                 | T        | Deletion     | 156   | kdpD - Sensor protein KdpD                           |

## insertion/deletion mutations (intergenic)

|        |        |   |          |     |
|--------|--------|---|----------|-----|
| 379293 | 380066 | G | Deletion | 230 |
|--------|--------|---|----------|-----|

SNPs in NC-7/34

Reference: W3110 genome (NC\_007779.1)

Red color: mutations that NC-7 does not have

Table S3

| reference position | ref_base<>> sample_base | gene direction | aa_mutation | mutate_type    | gene_pos_start | gene_pos_end | Total Depth | Mutation Depth | gene name                                                                                                                  |
|--------------------|-------------------------|----------------|-------------|----------------|----------------|--------------|-------------|----------------|----------------------------------------------------------------------------------------------------------------------------|
| 2927               | A<->G                   | +              | T<->A       | Nonsynonymous  | 2801           | 3733         | 269         | 269            | thrB - Homoserine kinase                                                                                                   |
| 151336             | C<->T                   | +              | C<->G       | Synonymous     | 141640         | 151299       | 259         | 259            | dnaJ - Chaperone protein DnaJ                                                                                              |
| 21850              | A<->G                   | +              | L<->I       | Synonymous     | 21407          | 22348        | 268         | 268            | ribF - Bifunctional riboflavin kinase/FMN adenylyltransferase                                                              |
| 31866              | G<->A                   | +              | PC->P       | Synonymous     | 30817          | 34038        | 268         | 268            | carB - Carbamoyl-phosphate synthase large chain                                                                            |
| 33956              | G<->A                   | +              | GC->D       | Nonsynonymous  | 30817          | 34038        | 301         | 299            | carB - Carbamoyl-phosphate synthase large chain                                                                            |
| 61618              | G<->A                   | +              | WC->*       | Premature_stop | 60358          | 63264        | 263         | 262            | rapA - RNA polymerase-associated protein RapA                                                                              |
| 78795              | T<->C                   | +              | Y<->A       | Nonsynonymous  | 77621          | 78799        | 240         | 240            | setA - Sugar efflux transporter A                                                                                          |
| 97378              | C<->T                   | +              | L<->L       | Synonymous     | 97087          | 98403        | 285         | 284            | murD - UDP-N-acetylmuramoylalanine-D-glutamate ligase                                                                      |
| 100541             | G<->A                   | +              | A<->T       | Nonsynonymous  | 99644          | 100711       | 233         | 233            | murG - UDP-N-acetylglucosamine-N-acetylmuramyl-(pentapeptide) pyrophosphoryl-undecaprenol N-acetylglucosaminyl transferase |
| 105062             | C<->T                   | +              | PC->P       | Nonsynonymous  | 103982         | 105244       | 266         | 266            | ftsA - Cell division protein FtsA                                                                                          |
| 111392             | C<->T                   | +              | PC->P       | Nonsynonymous  | 111044         | 111433       | 275         | 273            | mutT - 8-oxo-dGTP diphosphatase                                                                                            |
| 132188             | C<->T                   | +              | PC->P       | Nonsynonymous  | 131615         | 134212       | 304         | 304            | acnB - Aconitate hydratase B                                                                                               |
| 132526             | C<->T                   | +              | GC->D       | Synonymous     | 131615         | 134212       | 279         | 276            | acnB - Aconitate hydratase B                                                                                               |
| 134941             | T<->C                   | +              | HC->H       | Synonymous     | 134788         | 135582       | 249         | 249            | speD - S-adenosylmethionine decarboxylase proenzym                                                                         |
| 137392             | G<->A                   | +              | GC->R       | Nonsynonymous  | 137083         | 138633       | 289         | 288            | cueO - Multicopper oxidase (Laccase)                                                                                       |
| 150554             | G<->A                   | +              | Y<->I       | Nonsynonymous  | 149715         | 150953       | 242         | 241            | yadC - Putative fimbrial-like adhesin protein                                                                              |
| 168300             | G<->A                   | +              | EC->K       | Nonsynonymous  | 167484         | 169727       | 255         | 255            | fhuA - Ferrichrome-iron receptor FhuA                                                                                      |
| 181508             | T<->C                   | +              | SC->P       | Nonsynonymous  | 180884         | 182308       | 294         | 291            | degP - Periplasmic serine endoprotease DegP precursor                                                                      |
| 184485             | A<->G                   | +              | EC->E       | Synonymous     | 184257         | 185069       | 260         | 260            | yaeI - Phosphodiesterase YaeI                                                                                              |
| 190123             | G<->A                   | +              | A<->T       | Nonsynonymous  | 189874         | 190599       | 265         | 265            | rpsB - 30S ribosomal protein S2                                                                                            |
| 192429             | T<->C                   | +              | Y<->A       | Nonsynonymous  | 191855         | 192580       | 308         | 308            | pyrH - Uridylate kinase                                                                                                    |
| 198729             | C<->T                   | +              | L<->P       | Nonsynonymous  | 197928         | 200360       | 261         | 261            | bamA - Outer membrane protein assembly factor BamA                                                                         |
| 199515             | G<->A                   | +              | GC->D       | Nonsynonymous  | 197928         | 200360       | 271         | 270            | bamA - Outer membrane protein assembly factor BamA                                                                         |
| 199536             | T<->C                   | +              | SC->P       | Nonsynonymous  | 197928         | 200360       | 267         | 266            | bamA - Outer membrane protein assembly factor BamA                                                                         |
| 203991             | C<->T                   | +              | T<->M       | Nonsynonymous  | 203348         | 204496       | 294         | 292            | lpxB - Lipid-A disaccharide synthase                                                                                       |
| 212759             | C<->T                   | +              | Y<->V       | Synonymous     | 212331         | 213629       | 286         | 286            | tisL - tRNA(Ile)-lysidine synthase                                                                                         |
| 234048             | G<->A                   | +              | R<->R       | Synonymous     | 234027         | 234782       | 280         | 279            | gloB - Hydroxyacylglutathione hydrolase GloB                                                                               |
| 235748             | G<->A                   | +              | WC->*       | Premature_stop | 235535         | 236002       | 263         | 263            | rnhA - Ribonuclease H                                                                                                      |
| 241768             | A<->G                   | +              | GC->G       | Synonymous     | 240859         | 243303       | 279         | 277            | fadE - Acyl-CoA dehydrogenase                                                                                              |
| 246249             | G<->A                   | +              | GC->E       | Nonsynonymous  | 246242         | 246502       | 267         | 267            | dinJ - Antitoxin DinJ                                                                                                      |
| 252983             | T<->C                   | +              | Y<->A       | Nonsynonymous  | 252709         | 253161       | 298         | 298            | yafP - Uncharacterized N-acetyltransferase YafP                                                                            |
| 253836             | G<->A                   | +              | Y<->A       | Synonymous     | 253666         | 254202       | 276         | 276            | peptide chain release factor H                                                                                             |
| 256374             | C<->T                   | +              | TC->P       | Nonsynonymous  | 256267         | 257771       | 241         | 241            | frsA - Esterase FrsA                                                                                                       |
| 271981             | G<->A                   | +              | GC->D       | Nonsynonymous  | 271692         | 272117       | 292         | 291            | hypO - Hypothetical protein                                                                                                |
| 273150             | C<->T                   | +              | WC->M       | Synonymous     | 272071         | 273216       | 178         | 178            | hypothetical protein                                                                                                       |
| 283759             | T<->C                   | +              | A<->A       | Synonymous     | 282425         | 284392       | 268         | 268            | yagF - D-xylonate dehydratase YagF                                                                                         |
| 287900             | A<->G                   | +              | T<->A       | Nonsynonymous  | 287628         | 288386       | 293         | 293            | yagI - Uncharacterized HTH-type transcriptional regulator YagI                                                             |
| 337962             | G<->A                   | +              | A<->A       | Synonymous     | 337549         | 338967       | 284         | 283            | yahG - Uncharacterized protein YahG                                                                                        |
| 338492             | G<->A                   | +              | GC->D       | Nonsynonymous  | 337549         | 338967       | 292         | 288            | yahG - Uncharacterized protein YahG                                                                                        |
| 340335             | C<->T                   | +              | T<->M       | Nonsynonymous  | 339389         | 340339       | 340         | 340            | yahI - Carbamate kinase-like protein YahI                                                                                  |
| 346855             | G<->A                   | +              | QC->Q       | Synonymous     | 346081         | 347667       | 238         | 238            | prpR - Propionate catabolism operon regulatory protein                                                                     |
| 351061             | T<->C                   | +              | L<->P       | Nonsynonymous  | 350439         | 351890       | 292         | 291            | prpD - 2-methylcitrate dehydratase                                                                                         |
| 364950             | G<->A                   | +              | D<->N       | Nonsynonymous  | 362455         | 365529       | 254         | 254            | lacZ - Beta-galactosidase                                                                                                  |
| 372497             | A<->G                   | +              | A<->G       | Nonsynonymous  | 372145         | 373095       | 294         | 294            | mhpF - Acetyldehyde dehydrogenase                                                                                          |
| 398307             | C<->A                   | +              | GC->D       | Nonsynonymous  | 398249         | 398557       | 236         | 235            | yahY - Inner membrane protein YahY                                                                                         |
| 403872             | C<->T                   | +              | L<->L       | Synonymous     | 402927         | 404042       | 249         | 247            | dgcC - Probable diguanylate cyclase DgcC                                                                                   |
| 438249             | T<->C                   | +              | Y<->H       | Nonsynonymous  | 437539         | 439401       | 250         | 250            | dxs - 1-deoxy-D-xylulose-5-phosphate synthase                                                                              |
| 438644             | C<->T                   | +              | PC->L       | Nonsynonymous  | 437539         | 439401       | 272         | 271            | dxs - 1-deoxy-D-xylulose-5-phosphate synthase                                                                              |
| 449023             | C<->T                   | +              | A<->A       | Synonymous     | 447874         | 449865       | 241         | 241            | cyoB - Cytochrome o ubiquinol oxidase subunit I                                                                            |
| 450121             | G<->A                   | +              | A<->A       | Synonymous     | 449887         | 450834       | 297         | 297            | HMPREF1608_04559 - Ubiquinol oxidase subunit 2                                                                             |
| 451523             | T<->C                   | +              | I<->T       | Nonsynonymous  | 451294         | 452769       | 266         | 266            | ampG - Protein AmpG                                                                                                        |
| 454754             | C<->T                   | +              | T<->T       | Nonsynonymous  | 454357         | 455655       | 258         | 258            | tig - Trigger factor                                                                                                       |
| 460180             | C<->T                   | +              | SC->P       | Nonsynonymous  | 458112         | 460466       | 217         | 217            | lon - Lon protease                                                                                                         |
| 473793             | T<->C                   | +              | PC->P       | Synonymous     | 473525         | 474381       | 253         | 253            | tesB - Acyl-CoA thioesterase II                                                                                            |
| 493792             | G<->A                   | +              | GC->D       | Nonsynonymous  | 493629         | 494234       | 276         | 275            | recP - Recombination protein RecP                                                                                          |
| 534446             | C<->T                   | +              | PC->L       | Nonsynonymous  | 533140         | 534921       | 225         | 225            | gcl - Glyoxylate carboxylase                                                                                               |
| 542970             | T<->C                   | +              | PC->L       | Nonsynonymous  | 542485         | 543270       | 241         | 240            | allE - (S)-ureidoglycine aminohydrolase                                                                                    |
| 547694             | A<->G                   | +              | EC->E       | Synonymous     | 547581         | 547841       | 290         | 290            | hypothetical protein                                                                                                       |
| 575425             | C<->T                   | +              | I<->I       | Synonymous     | 574981         | 576048       | 235         | 233            | porin OmpC                                                                                                                 |
| 588685             | C<->T                   | +              | A<->Y       | Nonsynonymous  | 587205         | 590177       | 291         | 290            | bacteriophage N4 adsorption protein A                                                                                      |
| 723991             | C<->T                   | +              | HC->H       | Synonymous     | 722152         | 724836       | 256         | 255            | HMPREF1620_04415 - Histidine kinase KdpD                                                                                   |
| 832354             | A<->G                   | +              | PC->R       | Nonsynonymous  | 831294         | 832658       | 261         | 261            | rheE - ATP-dependent RNA helicase RheE                                                                                     |
| 845812             | G<->A                   | +              | D<->N       | Nonsynonymous  | 843677         | 845902       | 246         | 245            | Msc5 Mechanosensitive ion channel                                                                                          |
| 882901             | G<->A                   | +              | A<->C       | Nonsynonymous  | 882398         | 883156       | 243         | 243            | deoR - Deoxyribose operon repressor                                                                                        |
| 932433             | T<->C                   | +              | SC->P       | Nonsynonymous  | 931507         | 932472       | 281         | 281            | trxB - Thioredoxin reductase                                                                                               |
| 944644             | G<->A                   | +              | AC->P       | Synonymous     | 944629         | 944741       | 266         | 266            | ycaD - Uncharacterized MFS-type transporter YcaD                                                                           |
| 963494             | A<->G                   | +              | PC->P       | Nonsynonymous  | 962417         | 964090       | 270         | 269            | rpsA - 30S ribosomal protein S1                                                                                            |
| 963678             | A<->G                   | +              | GC->R       | Nonsynonymous  | 962417         | 964090       | 288         | 288            | rpsA - 30S ribosomal protein S1                                                                                            |
| 973612             | C<->A                   | +              | PC->Q       | Nonsynonymous  | 973044         | 973823       | 265         | 264            | elyC - Envelope biogenesis factor ElyC                                                                                     |
| 977944             | T<->C                   | +              | L<->L       | Synonymous     | 976748         | 981208       | 265         | 265            | mukB - Chromosome partition protein MukB                                                                                   |
| 993869             | G<->A                   | +              | A<->T       | Nonsynonymous  | 993699         | 994466       | 228         | 228            | ssuB - Aliphatic sulfonates import ATP-binding protein SsuB                                                                |
| 1008500            | A<->G                   | +              | I<->Y       | Nonsynonymous  | 1008266        | 1010374      | 225         | 225            | rmlL - Ribosomal RNA large subunit methyltransferase K/L                                                                   |
| 1067992            | T<->C                   | +              | L<->L       | Synonymous     | 1067534        | 1068130      | 269         | 268            | EC55989_114 - NAD(P)H dehydrogenase (quinone)                                                                              |
| 1093686            | T<->C                   | +              | Y<->A       | Nonsynonymous  | 1093298        | 1094656      | 238         | 238            | GDGEF domain-containing protein                                                                                            |
| 1109401            | C<->A                   | +              | PC->Q       | Nonsynonymous  | 1109361        | 1110518      | 256         | 256            | mdoC - Glucans biosynthesis protein C                                                                                      |
| 112445             | T<->C                   | +              | Y<->Q       | Stop_nonyan    | 1110912        | 1112447      | 245         | 244            | mdoG - Glucans biosynthesis protein G precursor                                                                            |
| 112448             | T<->C                   | +              | Y<->Q       | Synonymous     | 1112448        | 1112447      | 245         | 244            | mdoH - Glucans biosynthesis glucosyltransferase H                                                                          |
| 1171413            | T<->C                   | +              | L<->P       | Nonsynonymous  | 1170989        | 1171951      | 227         | 227            | LysM peptidoglycan-binding domain-containing protein                                                                       |
| 1191557            | T<->C                   | +              | T<->T       | Synonymous     | 1191353        | 1192024      | 240         | 239            | phoP - Transcriptional regulatory protein PhoP                                                                             |
| 1195272            | C<->T                   | +              | QC->P       | Premature_stop | 1194244        | 1195350      | 252         | 251            | mmnA - tRNA-specific 2-thiouridylase MmnA                                                                                  |
| 1234562            | C<->T                   | +              | L<->L       | Synonymous     | 1234077        | 1234607      | 237         | 236            | dsbB - Disulfide bond formation protein B                                                                                  |
| 1283734            | A<->G                   | +              | K<->R       | Nonsynonymous  | 1281441        | 1285184      | 234         | 233            | narZ - Nitrate reductase, alpha subunit                                                                                    |
| 1303706            | A<->T                   | +              | N<->Y       | Nonsynonymous  | 1302896        | 1304527      | 229         | 229            | oppA - Oligopeptide ABC transporter substrate-binding protein                                                              |
| 1308450            | T<->C                   | +              | SC->A       | Nonsynonymous  | 1307478        | 1308482      | 203         | 203            | oppF - Oligopeptide transport ATP-binding protein OppF                                                                     |
| 1327427            | A<->G                   | +              | QC->R       | Nonsynonymous  | 1326460        | 1328355      | 210         | 210            | yqjQ - Uncharacterized protein YqjQ                                                                                        |
| 1342851            | G<->A                   | +              | D<->N       | Nonsynonymous  | 1342272        | 1343441      | 196         | 195            | yclM - Lipopolysaccharide assembly protein B                                                                               |
| 1352278            | T<->C                   | +              | MC->P       | Nonsynonymous  | 1351965        | 1352753      | 285         | 285            | fadI - Enoyl-acyl-carrier-protein reductase [NADH] FadI                                                                    |
| 1356097            | C<->T                   | +              | BC->C       | Nonsynonymous  | 1359516        | 1360901      | 216         | 216            | pupP - Putrescine importer PupP                                                                                            |
| 1360573            | A<->G                   | +              | Y<->C       | Nonsynonymous  | 1359516        | 1360901      | 226         | 226            | pupP - Putrescine importer PupP                                                                                            |
| 1381065            | T<->C                   | +              | Y<->H       | Nonsynonymous  | 1379598        | 1381865      | 253         | 252            | yqjT - Uncharacterized glycosyl hydrolase YqjT                                                                             |
| 1394948            | A<->G                   | +              | HC->R       | Nonsynonymous  | 1394941        | 1396554      | 263         | 263            | mppA - Periplasmic murein peptide-binding protein precursor                                                                |
| 1395099            | C<->T                   | +              | A<->A       | Synonymous     | 1394941        | 1396554      | 263         | 263            | mppA - Periplasmic murein peptide-binding protein precursor                                                                |
| 1401237            | A<->C                   | +              | I<->L       | Nonsynonymous  | 1400488        | 1401240      | 263         | 262            | fnr - Fumarate and nitrate reduction regulatory protein                                                                    |
| 1671278            | A<->G                   | +              | Y<->C       | Nonsynonymous  | 1670413        | 1671306      | 269         | 268            | Uncharacterized HTH-type transcriptional regulator YnfL                                                                    |
| 1727618            | A<->G                   | +              | EC->G       | Nonsynonymous  | 1727395        | 1727634      | 246         | 246            | ydhL - Uncharacterized protein YdhL                                                                                        |
| 1746084            | A<->G                   | +              | QC->R       | Nonsynonymous  | 1745171        | 1746544      | 247         | 247            | mdtK - Multidrug resistance protein MdtK                                                                                   |
| 1794537            | T<->C                   | +              | EC->R       | Synonymous     | 1795272        | 1795923      | 247         | 247            | btuE - Thioredoxin/glutathione peroxidase BtuE                                                                             |
| 1799022            | T<->C                   | +              | CC->R       | Nonsynonymous  | 1797271        | 1798658      | 270         | 267            | phoT - Phenylalanine-tRNA ligase beta subunit                                                                              |
| 1842973            | G<->A                   | +              | GC->S       | Nonsynonymous  | 1842497        | 1843117      | 308         | 306            | ynfF - Predicted phosphatidyl transferase, inner membrane protein                                                          |
| 1924192            | C<->T                   | +              | SC->S       | Synonymous     | 1924027        | 1924683      | 230         | 230            | pphA - Serine/threonine-protein phosphatase 1                                                                              |
| 1935684            | C<->T                   | +              | A<->Y       | Nonsynonymous  | 1934507        | 1936318      | 261         | 260            | edd - Phosphogluconate dehydratase                                                                                         |
| 1998605            | A<->G                   | +              | Y<->C       | Nonsynonymous  | 1998247        | 1998969      | 275         | 275            | sdia - Regulatory protein                                                                                                  |

|               |   |                |                |         |         |     |     |                                                                      |
|---------------|---|----------------|----------------|---------|---------|-----|-----|----------------------------------------------------------------------|
| 2389995 A<->G | - | Y<->C          | Nonsynonymous  | 2388665 | 2390392 | 271 | 271 | yfbK - Uncharacterized protein YfbK                                  |
| 2396554 A<->G | - | A<->A          | Synonymous     | 2396182 | 2397711 | 294 | 294 | nuoM - NADH:quinone oxidoreductase subunit M                         |
| 2400347 C<->T | - | L<->F          | Nonsynonymous  | 2400012 | 2400566 | 270 | 270 | nuoJ - NADH:ubiquinone oxidoreductase, membrane subunit J            |
| 2406205 T<->C | - | T<->T          | Synonymous     | 2404888 | 2406225 | 253 | 253 | nuoF - NADH:quinone oxidoreductase subunit F                         |
| 2407444 T<->C | - | W<->R          | Nonsynonymous  | 2406725 | 2408151 | 260 | 260 | nuoC - NADH:quinone oxidoreductase subunit C/D                       |
| 2432495 A<->G | - | L<->L          | Synonymous     | 2432451 | 2433237 | 273 | 273 | argT - Lysine-arginine-ornithine-binding periplasmic protein         |
| 2436367 A<->G | - | MC->V          | Nonsynonymous  | 2433503 | 2434072 | 219 | 219 | ubiX - Flavin prenyltransferase UbiX                                 |
| 2435840 A<->G | - | T<->A          | Nonsynonymous  | 2435721 | 2436209 | 244 | 244 | cvpA - Colicin V production protein                                  |
| 2441303 T<->C | - | F<->L          | Nonsynonymous  | 2441082 | 2442095 | 289 | 289 | usg - USG-1 protein                                                  |
| 2443992 G<->A | + | G<->G          | Synonymous     | 2443396 | 2444391 | 277 | 277 | flk - Flagellar regulator flk                                        |
| 2513309 T<->C | - | Y<->A          | Nonsynonymous  | 2512093 | 2513340 | 259 | 259 | yfcJ - Uncharacterized MFS-type transporter YfcJ                     |
| 2546998 T<->C | - | Y<->A          | Nonsynonymous  | 2546250 | 2547125 | 267 | 267 | Sulfate transport system permease protein CysW                       |
| 2573345 G<->A | - | E<->E          | Synonymous     | 2572958 | 2573659 | 281 | 281 | eutQ - Ethanolamine utilization protein EutQ                         |
| 2603511 C<->T | + | G<->G          | Synonymous     | 2603467 | 2604906 | 269 | 269 | hydD - Hydrogenase-4 component D                                     |
| 2607052 G<->A | + | Y<->T          | Nonsynonymous  | 2605573 | 2607153 | 266 | 266 | hydF - Hydrogenase-4 component F                                     |
| 2630956 G<->A | + | G<->D          | Nonsynonymous  | 2629614 | 2631191 | 242 | 242 | guaA - GMP synthase [glutamine-hydrolyzing]                          |
| 2645124 A<->G | - | EC->E          | Synonymous     | 2643669 | 2645981 | 246 | 246 | pbpC - Penicillin-binding protein 1C                                 |
| 2649982 T<->C | - | Y<->A          | Nonsynonymous  | 2645982 | 2650943 | 236 | 236 | yfhM - Uncharacterized lipoprotein YfhM precursor                    |
| 2655895 C<->T | - | A<->V          | Nonsynonymous  | 2655741 | 2657591 | 305 | 305 | hscA - Chaperone protein HscA                                        |
| 2677153 G<->A | - | Y<->I          | Nonsynonymous  | 2677040 | 2678023 | 241 | 241 | yphF - ABC transporter periplasmic-binding protein yphF              |
| 2683546 C<->T | - | G<->G          | Synonymous     | 2682910 | 2684163 | 258 | 258 | glyA - Serine hydroxymethyltransferase                               |
| 2686208 G<->A | - | A<->T          | Nonsynonymous  | 2686125 | 2687459 | 269 | 269 | glrR - Transcriptional regulatory protein GlrR                       |
| 2688453 C<->T | - | S<->S          | Synonymous     | 2688327 | 2689754 | 251 | 251 | glrK - Sensor histidine kinase GlrK                                  |
| 2712527 C<->T | + | F<->N          | Nonsynonymous  | 2711552 | 2712886 | 272 | 272 | srnB - ATP-dependent RNA helicase SrnB                               |
| 2715811 T<->C | + | EC->Y          | Nonsynonymous  | 2715118 | 2716118 | 271 | 271 | ung - Uracil-DNA glycosylase                                         |
| 2716872 C<->T | - | A<->D          | Nonsynonymous  | 2716147 | 2717184 | 271 | 271 | yifF - Hypothetical tRNA/tRNA methyltransferase yifF                 |
| 2720188 C<->T | + | PC->L          | Nonsynonymous  | 2718609 | 2721269 | 287 | 287 | pka - Protein lysine acetyltransferase Pka                           |
| 2734071 G<->A | - | MC->I          | Nonsynonymous  | 2733687 | 2734667 | 265 | 265 | rIuD - Ribosomal large subunit pseudouridine synthase D              |
| 2749579 C<->T | + | C<->C          | Synonymous     | 2749487 | 2750365 | 247 | 247 | yfjB - NAD kinase                                                    |
| 2757391 A<->G | + | N<->S          | Nonsynonymous  | 2757300 | 2757512 | 290 | 290 | alpa - DNA-binding transcriptional activator AlpA                    |
| 2777205 G<->A | - | G<->D          | Nonsynonymous  | 2776802 | 2781382 | 237 | 237 | yjpA - Uncharacterized outer membrane protein YjpA precursor         |
| 2811738 T<->A | + | I<->N          | Nonsynonymous  | 2811272 | 2812810 | 263 | 263 | emrB - Multidrug export protein EmrB                                 |
| 2820080 C<->G | - | G<->G          | Synonymous     | 2818037 | 2820667 | 234 | 234 | alaS - Alanine-tRNA ligase                                           |
| 2830412 G<->A | - | F<->V          | Synonymous     | 2829431 | 2830945 | 323 | 323 | Anaerobic nitric oxide reductase transcription regulator NorR        |
| 2852389 G<->A | + | Premature_stop |                | 2851910 | 2852920 | 274 | 274 | hypE - Carbamoyl dehydratase HypE                                    |
| 2860426 C<->T | - | A<->Y          | Nonsynonymous  | 2860086 | 2860994 | 312 | 312 | ltnD - L-threonate dehydrogenase                                     |
| 2866111 T<->C | - | +<->G          | Nonsynonymous  | 2865215 | 2866207 | 302 | 302 | RNA polymerase sigma factor RpoS Qualifiers:Pseudo                   |
| 2866662 A<->G | - | S<->G          | Nonsynonymous  | 2866270 | 2867409 | 297 | 297 | nlpD - Outer membrane lipoprotein                                    |
| 2869181 A<->G | - | F<->V          | Synonymous     | 2868911 | 2869960 | 272 | 272 | truD - tRNA pseudouridine synthase D                                 |
| 2878492 G<->A | - | G<->G          | Synonymous     | 2878444 | 2879043 | 273 | 273 | casE - CRISPR system Cascade subunit CasE                            |
| 2885753 G<->A | - | W<->V          | Premature_stop | 2883209 | 2885875 | 258 | 258 | ygcB - CRISPR-associated endonuclease/helicase Cas3                  |
| 2894674 G<->A | - | Y<->M          | Nonsynonymous  | 2894432 | 2895211 | 346 | 346 | ygcR - Putative electron transfer flavoprotein subunit YgcR          |
| 2952371 G<->A | - | Y<->M          | Synonymous     | 2951117 | 2954659 | 266 | 266 | recB - RecBCD enzyme subunit RecB                                    |
| 2955708 G<->A | - | G<->D          | Synonymous     | 2954652 | 2957540 | 283 | 283 | ptrA - Protease 3 precursor                                          |
| 2964118 G<->A | - | T<->Y          | Nonsynonymous  | 2963818 | 2964693 | 293 | 293 | yqgI - Protoporphyrin IX:glutamate-yl transferase                    |
| 2966847 G<->A | - | A<->T          | Nonsynonymous  | 2964844 | 2967090 | 298 | 298 | Phosphoenolpyruvate:protein phosphotransferase ptsP                  |
| 2969176 C<->T | + | SC->T          | Nonsynonymous  | 2969076 | 2969789 | 267 | 267 | ygdQ - UPOF053 inner membrane protein YgdQ                           |
| 2972309 G<->A | - | G<->G          | Synonymous     | 2971325 | 2972518 | 276 | 276 | lptS - Lysophospholipid transporter LptI                             |
| 3021172 C<->T | + | R<->C          | Nonsynonymous  | 3019972 | 3022842 | 294 | 294 | A1WS_03602 - Selenate reductase subunit YgfN                         |
| 3034334 G<->A | - | Y<->M          | Nonsynonymous  | 3033840 | 3034838 | 302 | 302 | peptide chain release factor 2                                       |
| 3050670 A<->G | - | S<->G          | Nonsynonymous  | 3049771 | 3050973 | 320 | 320 | 2-oxopentylphenol hydroxylase ubil                                   |
| 3056063 A<->G | - | EC->R          | Nonsynonymous  | 3055834 | 3057066 | 289 | 289 | serA - Phosphoglycerate dehydrogenase                                |
| 3056725 G<->A | - | EC->E          | Synonymous     | 3055834 | 3057066 | 238 | 238 | serA - Phosphoglycerate dehydrogenase                                |
| 3075082 G<->A | - | G<->D          | Nonsynonymous  | 3074835 | 3076112 | 286 | 286 | yggP - Uncharacterized protein YggP                                  |
| 3083267 G<->A | - | G<->D          | Nonsynonymous  | 3082591 | 3084567 | 274 | 274 | speA - Biosynthetic arginine decarboxylase                           |
| 3093593 C<->T | + | C<->T          | Synonymous     | 3095237 | 3095930 | 286 | 286 | rdgB - dITP/ATP pyrophosphatase                                      |
| 3116446 G<->A | - | T<->T          | Synonymous     | 3113206 | 3117768 | 284 | 284 | yqhJ - Putative lipoprotein AcdF homolog precursor                   |
| 3123063 T<->C | - | EC->E          | Synonymous     | 3122892 | 3124115 | 300 | 300 | glcF - Glycolate oxidase iron-sulfur subunit                         |
| 3124976 G<->A | - | G<->E          | Nonsynonymous  | 3124126 | 3125178 | 293 | 293 | glcE - Glycolate oxidase subunit GlcE                                |
| 3140476 T<->C | - | G<->G          | Synonymous     | 3139942 | 3141645 | 313 | 313 | hybC - Probable large subunit, hydrogenase-2                         |
| 3146218 G<->A | - | Y<->I          | Nonsynonymous  | 3145512 | 3146275 | 294 | 294 | dienelactone hydrolase Qualifiers: Pseudo                            |
| 3155719 C<->T | + | R<->R          | Synonymous     | 3155279 | 3156106 | 338 | 338 | dkgA - 2,5-diketo-D-gluconic acid reductase A                        |
| 3180093 C<->T | + | EC->E          | Synonymous     | 3179077 | 3180237 | 286 | 286 | yglC - Putative acid-amine ligase YglC                               |
| 3182749 G<->A | - | G<->D          | Nonsynonymous  | 3182469 | 3183122 | 247 | 247 | ribB - 3,4-dihydroxy-2-butanone 4-phosphate synthase                 |
| 3189100 T<->C | + | N<->S          | Nonsynonymous  | 3186056 | 3188521 | 276 | 276 | yqgI - Putative outer membrane usher protein YqgI precursor          |
| 3202707 C<->A | - | SC->R          | Nonsynonymous  | 3201968 | 3202787 | 290 | 290 | ugpP - Undecaprenyl-diphosphatase                                    |
| 3213880 G<->A | - | EC->C          | Nonsynonymous  | 3213623 | 3214129 | 292 | 292 | mug - G/U mismatch-specific DNA glycosylase                          |
| 3214544 G<->A | - | A<->T          | Nonsynonymous  | 3214383 | 3215147 | 291 | 291 | yqhJ - NADPH-dependent ferric-chelate reductase                      |
| 3223777 C<->T | + | A<->V          | Nonsynonymous  | 3221289 | 3224381 | 279 | 279 | ebgA - Evolved beta-galactosidase subunit alpha                      |
| 3297658 G<->A | - | T<->T          | Synonymous     | 3296953 | 3297993 | 273 | 273 | yraQ - UPOF0718 protein YraQ                                         |
| 3300142 G<->A | - | Y<->I          | Nonsynonymous  | 3300110 | 3300613 | 306 | 306 | Uncharacterized N-acetyltransferase Yhb5                             |
| 3301440 C<->T | + | A<->Y          | Nonsynonymous  | 3301340 | 3302335 | 250 | 250 | yhbU - Uncharacterized protease YhbU precursor                       |
| 3308518 G<->A | - | A<->T          | Nonsynonymous  | 3307895 | 3308779 | 258 | 258 | nlpI - Lipoprotein NlpI precursor                                    |
| 3315263 G<->A | - | A<->T          | Nonsynonymous  | 3313197 | 3315869 | 291 | 291 | infB - Transcription initiation factor IF-2                          |
| 3316033 C<->T | - | A<->T          | Nonsynonymous  | 3315495 | 3317381 | 269 | 269 | inaA - Transcription termination/antitermination protein NusA        |
| 3327081 G<->A | - | A<->T          | Nonsynonymous  | 3326890 | 3327519 | 289 | 289 | rmeE - Ribosomal RNA large subunit methyltransferase E               |
| 3327329 G<->A | - | G<->D          | Nonsynonymous  | 3326890 | 3327519 | 312 | 312 | rmeE - Ribosomal RNA large subunit methyltransferase E               |
| 3331262 G<->A | - | L<->L          | Synonymous     | 3330437 | 3331609 | 254 | 254 | obg - GTPase Obg                                                     |
| 3334249 G<->A | + | D<->N          | Nonsynonymous  | 3333565 | 3334536 | 241 | 241 | ispB - Octaprenyl diphosphate synthase                               |
| 3339263 G<->A | - | D<->N          | Nonsynonymous  | 3339111 | 3339920 | 266 | 266 | Intermembrane phospholipid transport system ATP-binding protein MlfA |
| 3340526 C<->T | + | L<->F          | Nonsynonymous  | 3340130 | 3341107 | 323 | 323 | yrbG - Inner membrane protein YrbG                                   |
| 3343985 G<->A | + | D<->N          | Nonsynonymous  | 3343799 | 3344524 | 282 | 282 | ABC transporter ATP-binding protein                                  |
| 3367484 T<->C | + | Y<->A          | Nonsynonymous  | 3366781 | 3367497 | 248 | 248 | yhcF - Uncharacterized protein YhcF precursor                        |
| 3369470 G<->A | - | A<->T          | Nonsynonymous  | 3369330 | 3370205 | 288 | 288 | nanK - N-acetylmannosamine kinase                                    |
| 3387896 A<->C | - | T<->F          | Nonsynonymous  | 3386076 | 3388043 | 266 | 266 | p-hydroxybenzoic acid efflux pump subunit AaeB                       |
| 3408433 C<->T | - | PC->Y          | Nonsynonymous  | 3407078 | 3408529 | 236 | 236 | panF - Sodium/pantothenate symporter                                 |
| 3411949 C<->T | + | A<->Y          | Nonsynonymous  | 3411508 | 3412392 | 271 | 271 | yhdI - DNA adenine methyltransferase YhdI                            |
| 3420551 C<->T | + | A<->Y          | Nonsynonymous  | 3419989 | 3421170 | 261 | 261 | Putative amino-acid ABC transporter permease protein YhdX            |
| 3435534 C<->T | - | S<->S          | Synonymous     | 3435420 | 3436115 | 285 | 285 | yjaH - Uncharacterized protein YjaH                                  |
| 3454994 A<->G | - | Q<->R          | Nonsynonymous  | 3451408 | 3455436 | 293 | 293 | rpoB - DNA-directed RNA polymerase subunit beta                      |
| 3493366 A<->G | - | EC->E          | Synonymous     | 3493072 | 3494151 | 274 | 274 | frwC - Fructose-like permease IIC component 2                        |
| 3523688 T<->C | - | S<->S          | Synonymous     | 3523415 | 3523714 | 290 | 290 | yihS - UPOF0381 protein YihS                                         |
| 3536348 T<->C | + | Y<->H          | Nonsynonymous  | 3536156 | 3537190 | 269 | 269 | rhaT - L-rhamnose-proton symporter                                   |
| 3545428 G<->A | + | EC->K          | Nonsynonymous  | 3544315 | 3545766 | 281 | 281 | frvB - Fructose-like PTS system EIIBC component                      |
| 3549903 C<->T | - | L<->L          | Synonymous     | 3549832 | 3550665 | 272 | 272 | fdhD - Sulfur carrier protein FdhD                                   |
| 3552951 A<->C | + | EC->Y          | Nonsynonymous  | 3551495 | 3553909 | 302 | 302 | AhrI_03360 - Formate dehydrogenase-N subunit alpha - UniProt         |
| 3556206 G<->A | - | A<->T          | Nonsynonymous  | 3555453 | 3556382 | 266 | 266 | fdhE - Protein FdhE                                                  |
| 3561840 A<->G | - | EC->R          | Nonsynonymous  | 3561227 | 3562012 | 277 | 277 | Escherichia coli D7 DeoR family transcriptional regulator            |
| 3624880 T<->C | - | Y<->V          | Synonymous     | 3624706 | 3625605 | 248 | 248 | bioP - Biotin transporter                                            |
| 3638274 C<->T | - | A<->Y          | Nonsynonymous  | 3636536 | 3638698 | 278 | 278 | uvrD - DNA helicase                                                  |
| 3665074 C<->T | - | I<->I          | Synonymous     | 3664159 | 3665421 | 238 | 238 | wecC - UDP-N-acetyl-D-mannosamine dehydrogenase                      |
| 3665373 C<->T | - | F<->S          | Nonsynonymous  | 3664159 | 3665421 | 303 | 303 | wecC - UDP-N-acetyl-D-mannosamine dehydrogenase                      |
| 3669068 C<->T | - | L<->L          | Synonymous     | 3669005 | 3670264 | 237 | 237 | rho - Transcription termination factor Rho                           |
| 3677879 C<->T | - | S<->Y          | Nonsynonymous  | 3677236 | 3678711 | 280 | 280 | livC - Ketol-acid reductoisomerase (NADP(+))                         |
| 3679701 G<->T | - | G<->Y          | Nonsynonymous  | 3679462 | 3698454 | 270 | 270 | rbsR - Ribose operon repressor                                       |
| 3701081 G<->A | + | A<->F          | Nonsynonymous  | 3707078 | 3708529 | 249 | 249 | viaA - Protein ViaA                                                  |
| 3709275 C<->T | + | EC->H          | Synonymous     | 3708534 | 3709526 | 281 | 281 | asnA - Aspartate-ammonia ligase                                      |
| 3711421 T<->C | + | Y<->A          | Nonsynonymous  | 3711048 | 3712937 | 245 | 245 | mnmG - tRNA uridine 5-carboxymethylaminomethyl                       |
| 3737455 G<->A | + | W<->V          | Premature_stop | 3737288 | 3738010 | 277 | 277 | Uncharacterized protein YieK                                         |
| 3739732 C<->T | + | S<->F          | Nonsynonymous  | 3739242 | 3739907 | 274 | 274 | yieH - 6-phosphogluconate phosphatase                                |
| 3752481 T<->C | - | R<->R          | Synonymous     | 3752223 | 3753587 | 318 | 318 | mnmE - tRNA modification GTPase MnmE                                 |
| 3765362 G<->A | + | EC->E          | Synonymous     | 3765255 | 3765944 | 305 | 305 | dgoR - Galactonate operon transcriptional repressor                  |
| 3768002 C<->T | + | L<->L          | Synonymous     | 3767417 | 3768655 | 333 | 333 | dgoD - D-galactonate dehydratase                                     |
| 3769336 G<->A | + | D<->N          | Nonsynonymous  | 3768685 | 3769977 | 313 | 313 | dgoT - D-galactonate transporter                                     |
| 3810387 C<->T | - | L<->L          | Synonymous     | 3810079 | 3811470 | 337 | 337 | xanP - Xanthine permease XanP                                        |
| 3819632 G<->A | + | Y<->T          | Nonsynonymous  | 3819245 | 3820927 | 313 | 313 | ligB - DNA ligase B                                                  |
| 3823109 C<->T | - | EC->Y          | Premature_stop | 3822876 | 3823739 | 293 | 293 | yhcC - UPOF011 protein YhcC                                          |
| 3846193 C<->T | - | S<->T          | Nonsynonymous  | 384     |         |     |     |                                                                      |

|               |   |              |                |         |         |     |     |                                                                                |
|---------------|---|--------------|----------------|---------|---------|-----|-----|--------------------------------------------------------------------------------|
| 3946134 T<->C | + | F<->B        | Nonsynonymous  | 3945179 | 3947797 | 296 | 296 | Cellulose synthase catalytic subunit [UDP-forming] bcsA                        |
| 3947486 G<->A | + | V<->I        | Nonsynonymous  | 3945179 | 3947797 | 289 | 289 | Cellulose synthase catalytic subunit [UDP-forming] bcsA                        |
| 3956311 G<->A | + | A<->A        | Synonymous     | 3954797 | 3956785 | 291 | 291 | yhjK - Cyclic-di-GMP phosphodiesterase                                         |
| 3959538 C<->T | + | A<->V        | Nonsynonymous  | 3958475 | 3959971 | 340 | 340 | ECVG_03971 - Protein YhjI                                                      |
| 3980100 C<->T | + | K<->C        | Nonsynonymous  | 3980026 | 3981183 | 298 | 298 | mdIE - Multidrug resistance protein mdIE                                       |
| 3987881 C<->T | + | A<->V        | Nonsynonymous  | 3987283 | 3988035 | 295 | 294 | tsmJ - Ribosomal RNA small subunit methyltransferase J                         |
| 4008613 T<->C | + | S<->S        | Synonymous     | 4007825 | 4009447 | 267 | 267 | yhuJ - Uncharacterized protein YhuJ                                            |
| 4044826 C<->T | + | SK<->F       | Nonsynonymous  | 4044012 | 4044938 | 274 | 274 | High-affinity branched-chain amino acid transport system permease protein LivH |
| 4096319 G<->A | + | V<->M        | Nonsynonymous  | 4095572 | 4096342 | 247 | 247 | bioH - Pimeloyl-[acyl-carrier protein] methyl ester esterase                   |
| 4106900 C<->A | - | C<->A        | Premature_stop | 4105976 | 4107598 | 285 | 284 | pckA - Phosphoenolpyruvate carboxykinase (ATP)                                 |
| 4127720 G<->A | + | A<->T        | Nonsynonymous  | 4126778 | 4127782 | 312 | 312 | trpS - Tryptophan--tRNA ligase                                                 |
| 4134023 A<->C | + | K<->A        | Nonsynonymous  | 4133080 | 4134384 | 265 | 265 | yhfT - Uncharacterized protein YhfT                                            |
| 4142794 T<->C | - | L<->P        | Nonsynonymous  | 4142607 | 4143413 | 299 | 297 | nirC - Nitrite transporter NirC                                                |
| 4153852 C<->T | - | L<->L        | Synonymous     | 4153664 | 4154296 | 267 | 267 | cAMP-activated global transcriptional regulator CRP                            |
| 4154211 A<->C | - | K<->T        | Nonsynonymous  | 4153664 | 4154296 | 269 | 269 | cAMP-activated global transcriptional regulator CRP                            |
| 4174425 A<->G | - | K<->R        | Nonsynonymous  | 4174196 | 4174873 | 237 | 237 | Type 4 prelin-like proteins leader peptide-processing enzyme gspD              |
| 4175229 C<->T | - | P<->S        | Nonsynonymous  | 4174873 | 4175334 | 291 | 291 | gspM - Putative type II secretion system protein M                             |
| 4185186 C<->T | + | Q<->T        | Premature_stop | 4185018 | 4186487 | 240 | 238 | gspA - Export protein A for general secretion pathway                          |
| 4187209 A<->G | + | T<->A        | Nonsynonymous  | 4187146 | 4187457 | 324 | 324 | rpsJ - 30S ribosomal protein S10                                               |
| 4203298 A<->C | - | T<->P        | Nonsynonymous  | 4202522 | 4203898 | 286 | 285 | trkA - Trk system potassium uptake protein TrkA                                |
| 4218060 A<->T | + | Q<->L        | Nonsynonymous  | 4217870 | 4218799 | 284 | 284 | metAS - Homoserine O-succinyltransferase                                       |
| 4228142 C<->T | + | T<->I        | Nonsynonymous  | 4227418 | 4231101 | 253 | 253 | methI - Methionine synthase                                                    |
| 4228511 T<->C | + | V<->A        | Nonsynonymous  | 4227418 | 4231101 | 280 | 280 | methI - Methionine synthase                                                    |
| 4235829 C<->T | + | A<->V        | Nonsynonymous  | 4235144 | 4254064 | 254 | 253 | malM - Maltose operon periplasmic protein precursor                            |
| 4323774 T<->C | - | T<->B        | Nonsynonymous  | 4323439 | 4324204 | 297 | 297 | Alpha-D-ribose 1-methylphosphonate 5-phosphate C-P lyase phrI                  |
| 4328795 G<->A | - | G<->B        | Nonsynonymous  | 4328014 | 4329030 | 334 | 334 | phnD - Phosphonates-binding periplasmic protein precursor                      |
| 4333081 G<->A | + | A<->A        | Synonymous     | 4331813 | 4334041 | 324 | 324 | crfC - Clamp-binding protein CrfC                                              |
| 4393271 G<->A | - | A<->A        | Synonymous     | 4390727 | 4394050 | 328 | 328 | Miniconductance mechanosensitive channel MscM                                  |
| 4411432 A<->G | + | K<->K        | Synonymous     | 4411334 | 4413775 | 294 | 294 | rrr - Ribonuclease R                                                           |
| 4411451 C<->T | + | L<->L        | Synonymous     | 4411334 | 4413775 | 304 | 304 | rrr - Ribonuclease R                                                           |
| 4412798 C<->T | + | P<->B        | Nonsynonymous  | 4411334 | 4413775 | 279 | 278 | rrr - Ribonuclease R                                                           |
| 4415449 C<->T | + | L<->L        | Synonymous     | 4415233 | 4415931 | 328 | 328 | yjfJ - Uncharacterized protein YjfJ precursor                                  |
| 4426690 C<->T | + | I<->I        | Synonymous     | 4426388 | 4426852 | 277 | 277 | ptxA - Ascorbate-specific PTS system, EIIA component                           |
| 4491780 C<->T | + | K<->C        | Nonsynonymous  | 4490898 | 4491998 | 297 | 297 | Lipopolysaccharide export system permease protein LptF                         |
| 4505698 G<->A | - | start_nonsyn | start_nonsyn   | 4505468 | 4505698 | 283 | 282 | Lipopolysaccharide export system permease protein LptF                         |
| 4510917 C<->T | - | F<->P        | Synonymous     | 4509967 | 4511085 | 240 | 239 | yhjC - 1,5-anhydro-D-fructose reductase                                        |
| 4563196 C<->T | - | A<->A        | Synonymous     | 4563034 | 4564206 | 328 | 328 | iadA - Isoaspartyl dipeptidase                                                 |
| 4565975 A<->C | + | A<->A        | Synonymous     | 4565610 | 4566164 | 309 | 309 | kptA - RNA 2'-phosphotransferase                                               |
| 4583277 G<->A | - | P<->P        | Synonymous     | 4582638 | 4584017 | 289 | 289 | S-methylcytosine-specific restriction enzyme McrBC, subunit McrB               |
| 4622443 C<->T | + | D<->D        | Synonymous     | 4622003 | 4622782 | 263 | 263 | deoC - Deoxyribose-phosphate aldolase                                          |
| 4627768 C<->T | + | R<->R        | Synonymous     | 4626449 | 4627780 | 319 | 318 | yjjJ - Toxin YjjJ                                                              |

## SNPs (intergenic)

| reference position | ref_base<-> sample_base | mutate_ type | Total Depth | Mutation Depth |
|--------------------|-------------------------|--------------|-------------|----------------|
| 197926             | C<->T                   | intergenic   | 226         | 226            |
| 296550             | C<->T                   | intergenic   | 276         | 275            |
| 489161             | T<->C                   | intergenic   | 234         | 234            |
| 582068             | C<->T                   | intergenic   | 249         | 249            |
| 664388             | T<->C                   | intergenic   | 237         | 236            |
| 880916             | C<->T                   | intergenic   | 249         | 249            |
| 911515             | C<->T                   | intergenic   | 263         | 263            |
| 1228629            | A<->G                   | intergenic   | 223         | 223            |
| 1401247            | G<->A                   | intergenic   | 270         | 270            |
| 2092069            | T<->C                   | intergenic   | 231         | 231            |
| 2141860            | G<->A                   | intergenic   | 227         | 227            |
| 2708958            | C<->T                   | intergenic   | 291         | 291            |
| 2816944            | C<->T                   | intergenic   | 109         | 109            |
| 2816953            | A<->T                   | intergenic   | 121         | 121            |
| 2816959            | T<->A                   | intergenic   | 134         | 133            |
| 2816980            | G<->A                   | intergenic   | 173         | 173            |
| 2855617            | C<->T                   | intergenic   | 243         | 243            |
| 2941871            | C<->T                   | intergenic   | 294         | 294            |
| 2985962            | C<->T                   | intergenic   | 252         | 251            |
| 3006110            | C<->T                   | intergenic   | 277         | 277            |
| 3275045            | C<->T                   | intergenic   | 266         | 266            |
| 3374562            | A<->G                   | intergenic   | 246         | 245            |
| 3461024            | T<->C                   | intergenic   | 246         | 246            |
| 3464900            | T<->C                   | intergenic   | 264         | 264            |
| 3512196            | A<->T                   | intergenic   | 290         | 290            |
| 3566228            | G<->A                   | intergenic   | 239         | 237            |
| 3689634            | G<->A                   | intergenic   | 275         | 274            |
| 3932435            | C<->T                   | intergenic   | 291         | 291            |
| 3932468            | G<->T                   | intergenic   | 285         | 285            |
| 3975735            | G<->A                   | intergenic   | 266         | 266            |
| 4161616            | G<->A                   | intergenic   | 276         | 276            |
| 4189879            | G<->A                   | intergenic   | 257         | 257            |
| 4227228            | T<->C                   | intergenic   | 288         | 288            |
| 4342921            | C<->T                   | intergenic   | 284         | 284            |
| 4378916            | T<->C                   | intergenic   | 280         | 279            |
| 4514918            | T<->G                   | intergenic   | 263         | 263            |

## insertion/deletion mutations

| reference position start | reference position end | mutation | mutate_ type | Depth | gene name                                                      |
|--------------------------|------------------------|----------|--------------|-------|----------------------------------------------------------------|
| 4399749                  | 4399750                | G        | Deletion     | 249   | nnrE - Bifunctional NAD(P)H-hydrate repair enzyme              |
| 3031519                  | 3031519                | CT       | Insertion    | 244   | yqfG - Uncharacterized protein YqfG precursor                  |
| 3444350                  | 3444351                | C        | Deletion     | 249   | thiG - Thiazole synthase                                       |
| 3220087                  | 3220088                | G        | Deletion     | 227   | hypothetical protein                                           |
| 4428525                  | 4428526                | C        | Deletion     | 243   | ulfaf - L-Ribulose-5-phosphate 4-epimerase Ulfaf               |
| 2175523                  | 2175523                | CGGAT    | Insertion    | 230   | galC - PTS system galactitol-specific EIIc component           |
| 92585                    | 92585                  | G        | Insertion    | 261   | Peptidoglycan D,D-transpeptidase FtsI                          |
| 3421692                  | 3421693                | G        | Deletion     | 196   | amino acid ABC transporter permease                            |
| 1089485                  | 1089486                | T        | Deletion     | 191   | Poly-beta-1,6-N-acetyl-D-glucosamine N-deacetylase PgaB        |
| 996702                   | 996702                 | T        | Insertion    | 219   | ssaA - Putative aliphatic sulfonates-binding protein precursor |
| 2857105                  | 2857105                | CGCGAG   | Insertion    | 232   | mutS - DNA mismatch repair protein MutS                        |
| 551479                   | 551480                 | T        | Deletion     | 227   | purK - NS-carboxyaminoimidazole ribonucleotide synthase        |
| 34112                    | 34113                  | T        | Deletion     | 192   | hypothetical protein                                           |
| 547832                   | 547832                 | G        | Insertion    | 258   | hypothetical protein                                           |
| 118899                   | 118899                 | TG       | Insertion    | 225   | ampD - N-acetyl-anhydromuramyl-L-alanine amidase               |
| 1711533                  | 1711533                | CTGG     | Insertion    | 237   | rsxD - Ion-translocating oxidoreductase complex subunit D      |
| 1004576                  | 1004576                | G        | Insertion    | 204   | ydcF - Uncharacterized fibribral chaperone YdcF precursor      |
| 93307                    | 93308                  | G        | Deletion     | 225   | muE - UDP-N-acetylmuramoyl-L-alanyl-D-glutamate--2,6           |
| 1237850                  | 1237851                | G        | Deletion     | 184   | yqgB - Uncharacterized protein YqgB                            |
| 228970                   | 228971                 | G        | Deletion     | 149   | inosine/guanosine kinase                                       |
| 4610767                  | 4610767                | G        | Insertion    | 121   | tRNA-Leu                                                       |

## insertion/deletion mutations (intergenic)

|        |        |   |          |     |
|--------|--------|---|----------|-----|
| 379293 | 380066 | G | Deletion | 230 |
|--------|--------|---|----------|-----|
